1 **Stress response, behavior, and development are shaped by transposable**  
2 **element-induced mutations in *Drosophila***

3

4 Gabriel E. Rech<sup>1</sup>, Maria Bogaerts-Marquez<sup>1</sup>, Maite G. Barrón<sup>1</sup>, Miriam Merenciano<sup>1</sup>, José  
5 Luis Villanueva-Cañas<sup>1</sup>, Vivien Horváth<sup>1</sup>, Anna-Sophie Fiston-Lavier<sup>2</sup>, Isabelle Luyten<sup>3</sup>,  
6 Sandeep Venkataram<sup>4</sup>, Hadi Quesneville<sup>3</sup>, Dmitri A. Petrov<sup>4</sup>, and Josefa González<sup>1\*</sup>

7

8 <sup>1</sup> Institute of Evolutionary Biology (IBE). CSIC-Universitat Pompeu Fabra, Barcelona,  
9 Spain.

10 <sup>2</sup> Institut des Sciences de l'Evolution de Montpellier (UMR 5554, CNRS-UM-IRD-EPHE),  
11 Université de Montpellier, Place Eugène Bataillon, Montpellier, France.

12 <sup>3</sup> URGI, INRA, Université Paris-Saclay, Versailles, France.

13 <sup>4</sup> Department of Biology, Stanford University, Stanford, CA, USA.

14

15 \* Corresponding author

16 E-mail: josefa.gonzalez@ibe.upf-csic.es (JG)

17

## 18 **Abstract**

19 Mapping genotype to phenotype is challenging because of the difficulties in identifying  
20 both the traits under selection and the specific genetic variants underlying these traits. Most  
21 of the current knowledge of the genetic basis of adaptive evolution is based on the analysis  
22 of single nucleotide polymorphisms (SNPs). Despite increasing evidence for their causal  
23 role, the contribution of structural variants to adaptive evolution remains largely  
24 unexplored. In this work, we analyzed the population frequencies of 1,615 Transposable  
25 Element (TE) insertions in 91 samples from 60 worldwide natural populations of  
26 *Drosophila melanogaster*. We identified a set of 300 TEs that are present at high  
27 population frequencies, and located in genomic regions with high recombination rate,  
28 where the efficiency of natural selection is high. The age and the length of these 300 TEs  
29 are consistent with relatively young and long insertions reaching high frequencies due to  
30 the action of positive selection. Indeed, we, and others, found evidence of selective sweeps  
31 and/or population differentiation for 65 of them. The analysis of the genes located nearby  
32 these 65 candidate adaptive insertions suggested that the functional response to selection is  
33 related with the GO categories of response to stimulus, behavior, and development. We  
34 further showed that a subset of the candidate adaptive TEs affect expression of nearby  
35 genes, and five of them have already been linked to an ecologically relevant phenotypic  
36 effect. Our results provide a more complete understanding of the genetic variation and the  
37 fitness-related traits relevant for adaptive evolution. Similar studies should help uncover the  
38 importance of TE-induced adaptive mutations in other species as well.

39

## 40 **Introduction**

41 Understanding how organisms adapt to local environmental conditions requires identifying  
42 the loci and the phenotypic traits potentially targeted by natural selection, which should  
43 also provide critical knowledge for how organisms will respond to environmental change  
44 [1-3]. Organisms from plants to humans harbor genetic variation within and among  
45 populations that allows them to adapt to diverse local environments [4-6]. Genome scans  
46 for selection have almost exclusively focused on identifying single nucleotide  
47 polymorphisms (SNPs). However, while the role of other types of genetic variants, such as  
48 transposable element (TE) insertions and segmental duplications, in local adaptation has  
49 been suggested, these variants are often poorly characterized [7-10]. This is mainly due to  
50 technical limitations: short-read sequencing technologies make TE discovery and accurate  
51 genotyping difficult. However, deciphering the genetic basis of adaptation requires  
52 comprehensive knowledge of these other types of genetic variants, as there is evidence that  
53 they are important contributors to adaptive variation [9, 11, 12].

54 TEs are mobile DNA fragments that constitute a substantial albeit variable proportion of  
55 virtually all the genomes analyzed to date [13, 14]. TEs can create a variety of mutations  
56 from gene disruption to changes in gene expression and chromosome rearrangements [14,  
57 15]. Although the majority of TE-induced mutations are deleterious or neutral, there are  
58 multiple instances in which individual TE insertions have been shown to play a role in  
59 adaptive evolution [10-12, 16]. In humans, *MER41* insertions, a family of endogenous  
60 retroviruses, have dispersed interferon-inducible enhancers that promote the transcription of  
61 innate immunity factors [17]. In *Drosophila melanogaster*, the insertion of an *Accord*

62 retrotransposon in the upstream region of *Cyp6g1* gene leads to transcript up-regulation and  
63 increased resistance to several insecticides [18, 19].

64 However, only a few genome-wide screens have tried to systematically assess the role of  
65 TEs in adaptive evolution. In humans, the only screen so far focused on the analysis of a  
66 particular TE family, LINE-1 elements, and found that a fraction of these elements showed  
67 signatures of positive selection [20]. In *D. melanogaster*, genome-wide screens were  
68 initially performed based on a PCR-approach that only allowed studying a subset of all the  
69 euchromatic TEs present in the reference genome [7, 8, 21]. In *Arabidopsis thaliana*,  
70 genome-wide analysis of TE insertions revealed that TEs affect nearby gene expression and  
71 local patterns of DNA methylation, with some of these insertions likely to be involved in  
72 adaptation [22, 23]. Thus, while at the moment limited to species with good TE sequence  
73 annotations and genome datasets, genome-wide screens for putatively adaptive insertions  
74 are a promising strategy to identify genetic variants underlying adaptive evolution [24].

75 *D. melanogaster* is to date one of the best model systems to identify the genetic and  
76 functional basis of adaptive evolution. Originally from sub-tropical Africa, *D.*  
77 *melanogaster* has adapted in recent evolutionary time to a wide-range of environmental  
78 conditions [25, 26]. Indeed, there are hundreds of genome sequences available from  
79 worldwide populations [27]. This species has one of the best functionally annotated  
80 genomes, which facilitates the identification of traits under selection [28]. In addition, TE  
81 annotations in the *D. melanogaster* reference genome continue to be updated by the  
82 research community [29-31].

83 In this work, we screened 303 individual genomes, and 83 pooled samples (containing from  
84 30 to 440 chromosomes each) from 60 worldwide natural *D. melanogaster* populations to  
85 identify the TE insertions most likely involved in adaptive evolution (Fig 1). In addition to  
86 the age and the size of the 1,615 TEs analyzed, we calculated four different statistics to  
87 detect potentially adaptive TEs. The GO enrichment analysis of the genes located nearby  
88 our set of candidate adaptive insertions pinpoint response to stimulus, behavior, and  
89 development as the traits more likely to be shaped by TE-induced mutations. Consistent  
90 with these results, genes located nearby our set of candidate adaptive TEs are significantly  
91 enriched for previously identified loci underlying stress- and behavior-related traits.  
92 Overall, our results suggest a widespread contribution of TEs to adaptive evolution in *D.*  
93 *melanogaster* and pinpoint relevant traits for adaptation.

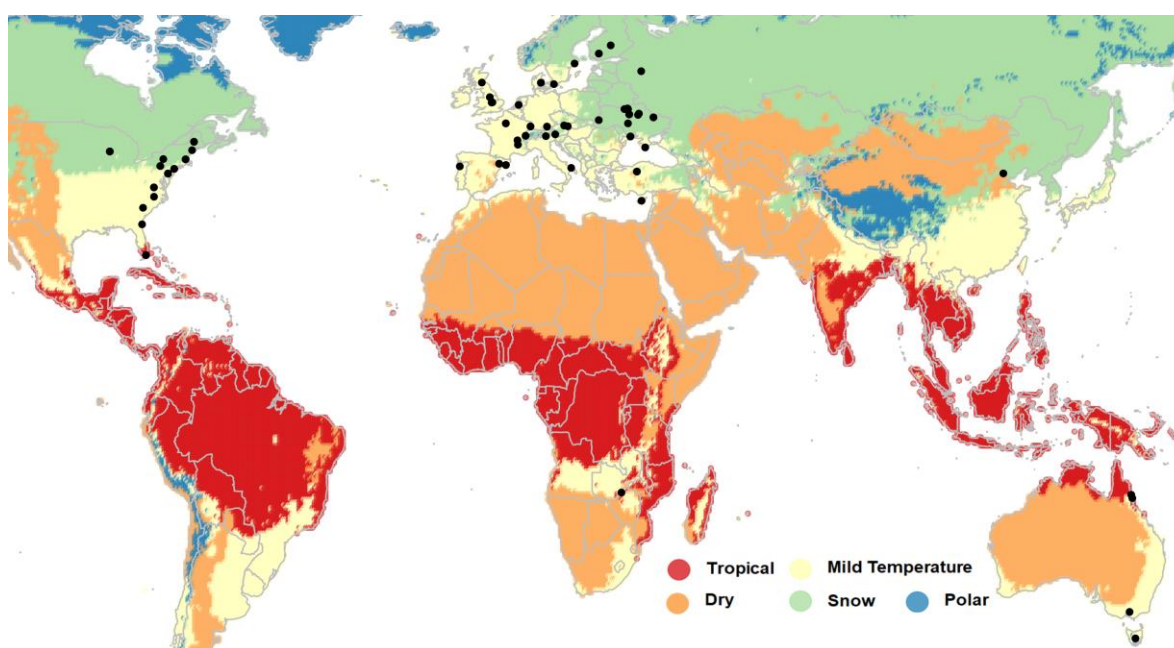

94

95 **Fig 1. Worldwide distribution of *D. melanogaster* populations used in this study.**  
96 Location of the 39 European, 14 North American, five Australian, one Asian, and one African  
97 population analyzed in this work. Note that the location of some populations overlap in the map.  
98 For more details, see S1 Table. Colors indicate the five major Köppen climate zones [32].

## 99 **Results**

### 100 **Natural populations of *D. melanogaster* contain hundreds of polymorphic TEs at high** 101 **population frequencies**

102 To identify TEs likely to be involved in adaptation, we looked for TEs present at high  
103 population frequencies, and located in genomic regions with high recombination rates (see  
104 Material and Methods). We expect TEs that increase the fitness of their carriers to be  
105 present at high frequency in the population(s) where adaptation took place [33-36]. In  
106 addition, among all the TEs present at high frequencies, TEs located in regions with high  
107 recombination rates are less likely to have increased in frequency neutrally compared with  
108 TEs located in low recombination regions. This is so because the efficiency of selection in  
109 genomic regions with low recombination rates tends to be lower due to the increase in noise  
110 generated by linked selection such as background selection and recurrent selective sweeps  
111 [37, 38]. Moreover, TEs located in low recombination regions are more likely to be linked  
112 to an adaptive mutation rather than being the causal mutation [33-35].

113

114 We first estimated population frequencies for 1,615 TE insertions in 91 samples from 60  
115 worldwide natural populations: 39 European, 14 North American, five Australian, one  
116 Asian, and one African population collected in the ancestral range of the species (Fig 1 and  
117 S1 Table) (see Material and Methods). We classified the 1,615 TEs based on their  
118 population frequencies obtained with *Tlex2* [31], and on their genomic location in high or  
119 low recombination regions (Fig 2, S2 Table, see Material and Methods). 808 of the 1,615  
120 TEs were present in regions with low recombination rate. Most of these TEs (79%, 640 out  
121 of 808 TEs) were fixed, defined here as being present at > 95% frequency in all samples, in  
122 all the populations analyzed. Among the 807 TEs located in regions with high

123 recombination rates, 215 were fixed and 177 were present at low frequencies (LowFreq),  
124 defined here as being present at  $\leq 10\%$  frequency in each of the analyzed samples (Fig 2).  
125 Note that the percentage of fixed TEs in high recombination regions is significantly lower  
126 than the percentage in low recombination regions (27% vs 79% respectively, Chi-squared  
127  $p\text{-value} = 2.2 \times 10^{-16}$ ), as expected if the efficiency of selection is lower in low recombination  
128 regions, and slightly deleterious TEs reached fixation neutrally [37, 38]. Finally, 300 of the  
129 807 TEs located in high recombination regions were present at high frequencies  
130 (HighFreq), defined here as being present at  $< 95\%$  frequency overall and at  $> 10\%$   
131 frequency in at least three samples (Fig 2, S1 Fig).

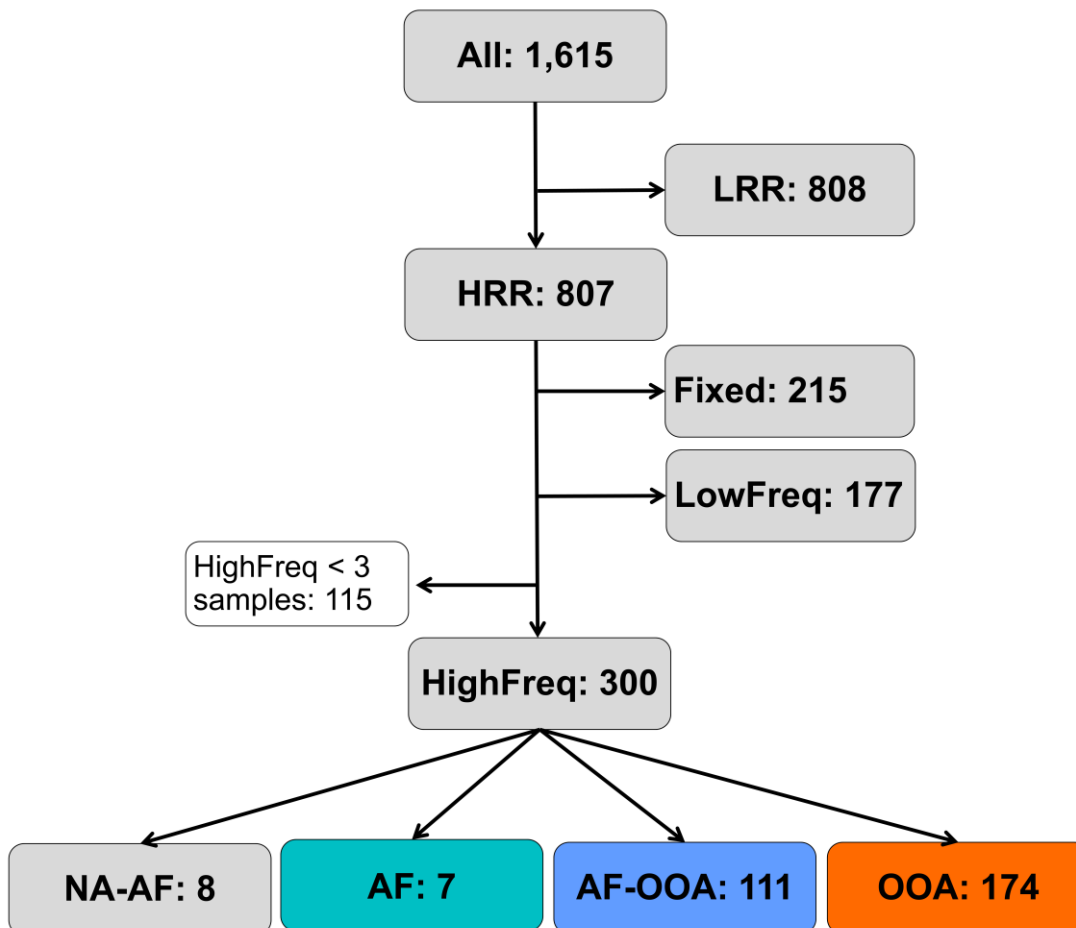

132

133 **Fig 2. Workflow showing the main steps applied for identifying TEs present at high**  
134 **frequencies in high recombination regions in the *D. melanogaster* genome.** LRR: TEs  
135 located at low recombination rate regions. HRR: TEs located at high recombination rate regions.  
136 Fixed: HRR TEs at frequencies > 95% in all populations. LowFreq: low frequency HRR TEs  
137 (frequencies < 10% in all samples). HighFreq: high frequency HRR TEs (frequencies < 95% in all  
138 samples and at >10% frequency in at least three samples). HighFreq TEs were further classified  
139 according to their frequency in African (AF) and/or out-of-Africa (OOA) populations: AF: TEs at  
140 high frequency only in the African population; AF-OOA: TEs at high frequency in Africa and out-  
141 of-Africa populations; OOA: TEs at high frequency in out-of-Africa populations and low frequency  
142 in the African population and NA-AF: TEs present at high frequency in out-of-Africa populations  
143 but for which we have no data for the African population.

144

145 We further classified these 300 TEs according to their frequency in African (AF) and/or  
146 out-of-Africa (OOA) populations: seven TEs were only present at high frequencies in the  
147 African population analyzed (AF), 111 were present at high frequencies both in African and  
148 in the out-of-Africa populations (AF-OOA), and 174 were present at high frequencies only  
149 in the out-of-Africa populations (OOA, Fig 2). TEs present at high frequencies both in  
150 African and out-of-African populations are more likely to be involved in global  
151 adaptations, while TEs present only in African or only in out-of-Africa populations could  
152 be involved in local adaptation. Overall, we identified 300 polymorphic TEs present at high  
153 frequencies and located in high recombination regions of the genome, which could have  
154 increased in frequency due to positive selection. However, it is also possible that some or  
155 many of these 300 TEs have increased in frequency neutrally.

156

157 **Age and length of TEs present at high frequencies in regions with high recombination**  
158 **are consistent with a putatively adaptive role of these insertions**

159 In addition to the population frequency, the age of a TE insertion can be informative about  
160 whether a TE is more likely to be adaptive, neutral, or deleterious. A young TE present at



161 high population frequencies is more likely to have increased in frequency due to recent  
162 positive selection, while old TEs present at high population frequencies might have slowly  
163 drifted to high frequency [21, 24]. Note that it is entirely possible that such old TEs did  
164 increase in frequency due to positive selection and have been maintained by balancing  
165 selection since then [39]. Nonetheless, in this paper we primarily focus on the identification  
166 of the subset of TEs that are most likely to be adaptive and are willing to tolerate  
167 potentially high false negative rates.

168

169 We estimated the age of all the TEs annotated in the reference genome using a phylogenetic  
170 approach (5,416 TEs, see Material and Methods). We compared our TE age estimates with  
171 previously available data for 437 TEs [21, 40]. Among the 417 TEs present in the two  
172 datasets, there are 10 TE insertions in our dataset that according to the TE age distributions  
173 were outliers (showed much higher age values estimates, S2A Fig). When we removed  
174 these 10 data points the correlation between the age estimates from the two studies was  
175 high ( $r^2$ : 0.71, p-value  $< 2.2 \times 10^{-16}$ , S2B Fig). Note that the TE age estimates obtained by  
176 these methods depend on the dataset used for generating the phylogenies, which differ  
177 between the two studies (437 TEs vs 5,416 TEs, S2 Fig).

178 We compared the TE age distributions between the different frequency groups, and we  
179 further classified TEs as “young” or “old” insertions according to whether the estimated  
180 terminal branch length was  $< 0.01$  or  $\geq 0.01$ , respectively (see Material and Methods). As  
181 mentioned above, most of the TEs in low recombination regions are fixed. Accordingly, we  
182 found that TEs present in low recombination regions and Fixed TEs in high recombination  
183 regions showed similar age distributions (Wilcoxon test, p-value = 0.321, Fig 3A) and  
184 contained a large proportion of old TEs, 71% and 75% respectively, as expected if these

185 two datasets contain mostly neutral TEs (Fig 3B, S3 Table). The age distribution of these  
186 two groups was different from the LowFreq and the HighFreq groups overall (Wilcoxon  
187 test,  $p\text{-value} < 2.2 \times 10^{-16}$ , Fig 3A).  
188 We found that all LowFreq TEs were young TEs (Fig 3B, S3 Table). This result is  
189 consistent with LowFreq TEs being slightly deleterious mutations that have not been yet  
190 removed from populations by purifying selection. Finally, the three subgroups of HighFreq  
191 TEs contained mostly young TEs (Fig 3B, S3 Table).

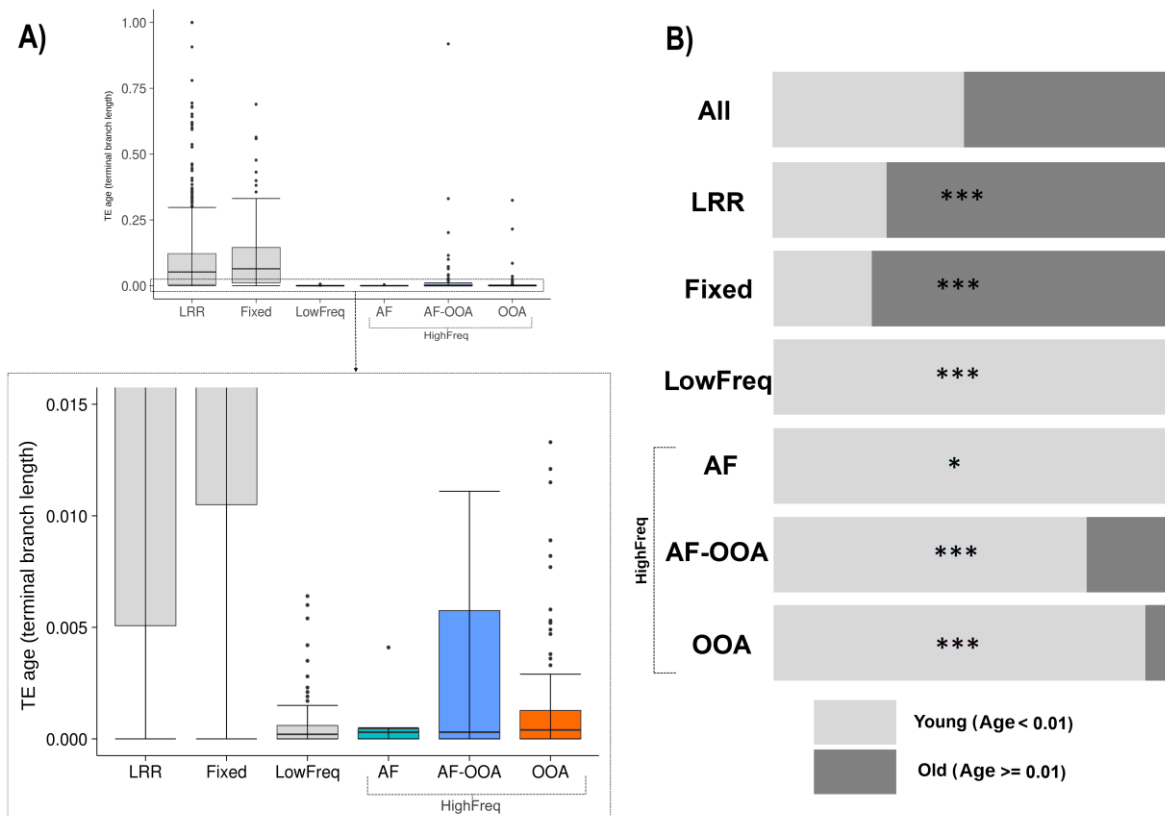

192

193 **Fig 3. TE age of the different frequency groups.** A) Top: Boxplots showing the distribution  
194 of TE age (terminal branch length) values for each of the categories. Bottom: Zoomed-in version of  
195 the boxed area showing the lowest values of the TE age distribution. B) Proportion of young (age <  
196 0.01) and old (age ≥ 0.01) TEs in each category. \*  $p\text{-value} < 0.05$ , \*\*\*  $p\text{-value} < 0.001$  from Chi-  
197 square test.

198

199

200 The length of a TE can also be informative about whether a TE is more likely to be  
201 adaptive, neutral, or deleterious. Because longer TEs are more likely to act as substrates for  
202 ectopic recombination leading to deleterious rearrangements, if a TE is long but it is present  
203 at high population frequencies, it is more likely to be adaptive [16, 41, 42]. In contrast,  
204 shorter TEs are both more likely to be nearly neutral in their selective effect due to lower  
205 rate of ectopic recombination among shorter homologous sequences and in addition more  
206 likely to be older and thus shorter because of the high rate of DNA loss in *Drosophila* [43].  
207 We used the TE length ratio, calculated as the proportion of the length of the TE insertion  
208 regarding the length of the canonical family sequence, as a proxy for measuring the relative  
209 length of the TEs in each group. We found statistically significant differences between the  
210 HighFreq and the other three TE groups: LowFreq, Fixed, and TEs in low recombination  
211 regions (S4 Table). In particular, HighFreq and LowFreq TEs show distributions of TE  
212 Length Ratio shifted upwards (median: 59.3 and 80.4 respectively), while the distributions  
213 of Fixed TEs and TEs in low recombination regions are shifted downwards, showing a  
214 predominance of shorter TEs (mean: 16.2 and 30.7 respectively) (Fig 4 and S4 Table). No  
215 differences in the TE length ratio among the HighFreq TEs subgroups were found (Kruskal  
216 Wallis test,  $p = 0.062$ ) (S4 Table).

217 When considering both age and length of the TEs across different categories, we found that  
218 Fixed TEs and TEs in low recombination regions show predominance of older and  
219 truncated TEs (Fig 4), which is consistent with old TE insertions that have reached fixation  
220 through processes other than positive selection. On the other hand, the HighFreq and  
221 LowFreq groups contain mostly large and young TEs (Fig 4). In the case of LowFreq TEs,  
222 these results are consistent with the hypothesis that low frequency TEs could be recent  
223 insertions that purifying selection still did not have time to eliminate. Finally, young and

224 large HighFreq TEs support the hypothesis of the presence in this group of a large number  
225 of recent putatively functional insertions that have rapidly increase in frequency due to the  
226 action of positive selection. Thus, for the rest of this work, we focused on HighFreq TEs to  
227 look for further evidence suggesting their contribution to adaptive evolution.

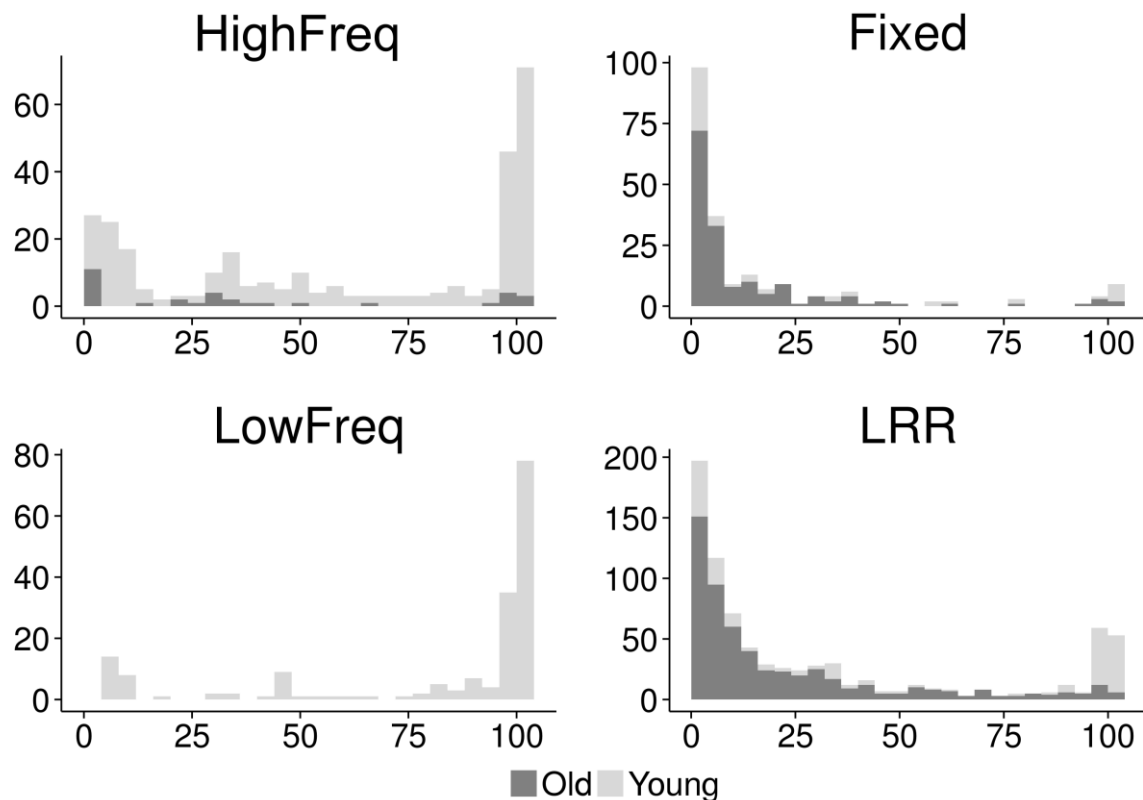

228

229 **Fig 4. Number of TEs at different TE Length Ratios (%).** Bars indicate number of TEs  
230 (vertical axis) per bin of TE Length Ratio (%) (horizontal axis) and color shade indicates the  
231 proportion of young and old TEs in each bin.

232

233 **TEs present at high frequencies in high recombination regions showed different**  
234 **signatures of positive selection**

235 To test whether HighFreq TEs showed signatures of positive selection, we used two  
236 different approaches: we looked for signatures of selective sweeps in the regions flanking  
237 the candidate adaptive TEs, and we looked for evidence of population differentiation

238 between populations located at the extremes of latitudinal clines in three continents: Europe  
239 (EU), North America (NA), and Australia.

240 To look for signatures of selective sweeps in the vicinity of the candidate TE insertions, we  
241 used three different haplotype-based methods in order to identify different signals of  
242 selective sweeps: (i) the *iHS* test mainly detects events of hard sweeps [44], (ii) the *H12* test  
243 detects both hard and soft sweeps [45], and (iii) the  $nS_L$  test detects sweeps under different  
244 scenarios, and it is more robust to recombination rate variation [46]. We independently  
245 applied these tests to two datasets: one dataset containing 141 strains from the Raleigh  
246 population in NA, and a second dataset containing 158 strains from four different  
247 populations in EU. Note that EU populations do not show latitudinal population structure,  
248 and thus we analyzed them together [47] (see Material and Methods). Overall, we were able  
249 to calculate at least one test, in at least one of the two continents, for 202 of the 300  
250 HighFreq TE insertions (S5 Table). To determine the significance of *iHS* and  $nS_L$  values,  
251 we compared them with the distribution of values obtained from neutral SNPs, while for  
252 *H12* we selected the top 15% values (see Material and Methods). Overall, 36 TEs showed  
253 evidence of selection (Fig 5 and S6 Table). The three tests identified similar numbers of  
254 significant TEs (Chi-square test,  $p$ -value = 0.350, S5 Table), however the overlap between  
255 the TEs identified by the different tests was low (S3A Fig). These results suggest that these  
256 36 TEs could be evolving under different selective scenarios, including both hard and soft  
257 sweeps.

258 We also tested whether the signals of selection differ among continents. For 31 out of the  
259 36 TEs that showed signatures of selection we had data from NA and EU populations.  
260 However, only 6 of these 31 TEs showed evidence of selection in both continents while the  
261 other 25 TEs were significant only in NA or only in EU, suggesting that the signatures of

262 selection could be continent specific (S3B Fig). Finally, while *iHS* and *nSL* identified  
 263 similar numbers of TEs in the two continents, H12 identified more significant TEs in NA  
 264 (Chi-square test, p-value = 0.032, S5 Table).

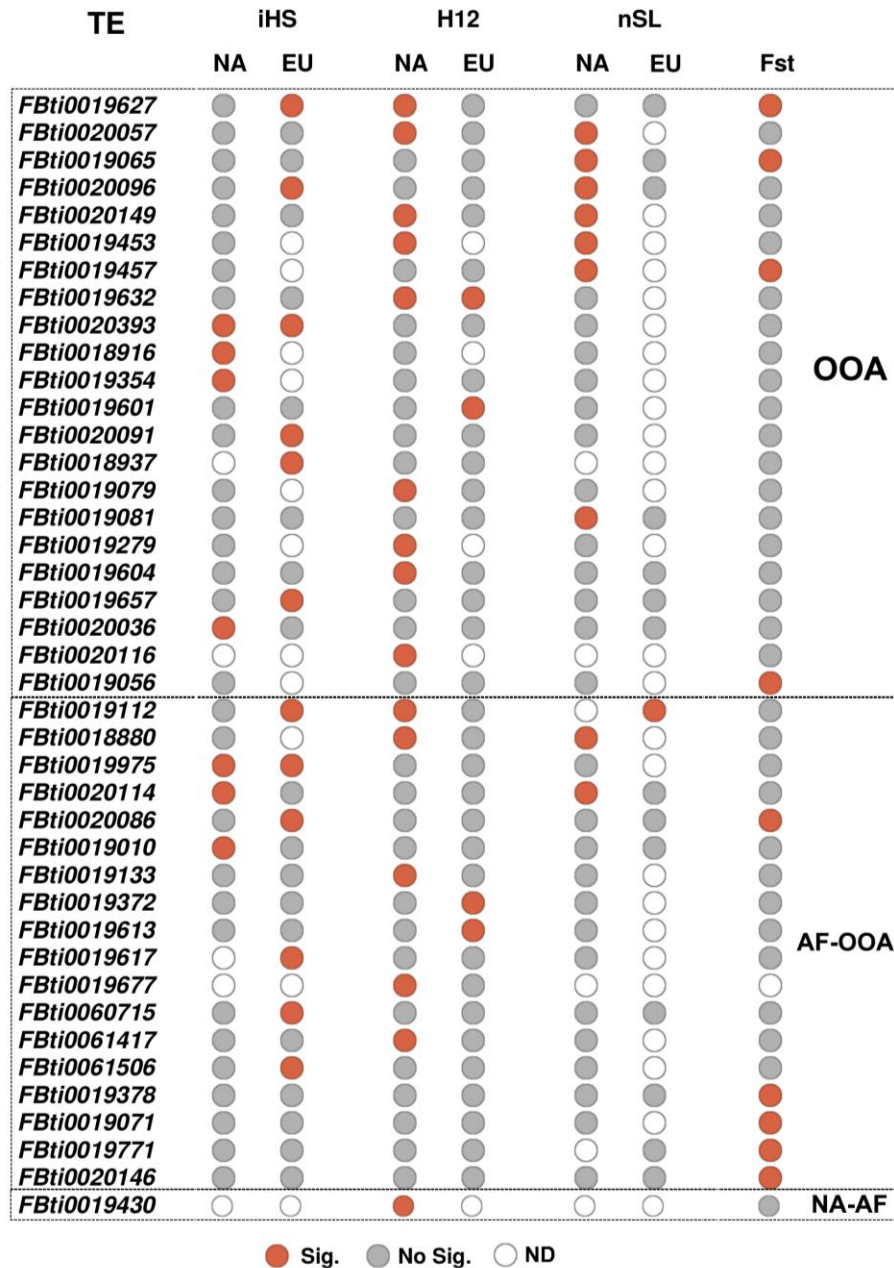

265  
 266 **Fig 5. HighFreq TEs with signals of selection.** 41 HighFreq TEs showing at least one signal  
 267 of selection either or both in the selective sweep tests (*iHS*, H12 or *nSL*, 36 TEs) or the population  
 268 differentiation test (*Fst*, 9 TEs). Red and grey circles indicate statistical significance for each TE at  
 269 each test and population (Significant and No significant, respectively). Empty circles (ND) indicates  
 270 that the test could not be calculated.

271  
272 Besides selective sweeps, we also looked for evidence of population differentiation using  
273 the pairwise  $F_{ST}$  estimator of Weir & Cockerham (1984) [48]. We performed six pairwise  
274 comparisons among latitudinal distant populations: two populations in EU, two in NA, and  
275 two in Australia (see Materials and Methods). We could estimate  $F_{ST}$  for 254 of the 300  
276 HighFreq TE insertions (S7 Table). To determine the significance of  $F_{ST}$  values, we  
277 compared them with the distribution of values obtained from neutral SNPs in each pair of  
278 populations (see Material and Methods). 78 TEs show significant  $F_{ST}$  values, and we  
279 further filter them by keeping only those that were significant in more than one pairwise  
280 comparison and consistently present at high frequencies in populations located in high  
281 latitudes or in low latitudes (concordant  $F_{ST}$ ) (see Material and Methods). After this  
282 filtering step, nine TEs were significant (S4 Fig). Five of these nine TEs were also  
283 identified as being under positive selection by at least one haplotype-based test (Fig 5).  
284 Overall, we could calculate at least one statistic for 273 HighFreq TEs, and 41 of them  
285 showed evidence of positive selection (Fig 5, S5 Table). TEs present at high frequencies  
286 both in African and in the out-of-Africa populations (AF-OOA), and TEs present at high  
287 frequencies only in the out-of-Africa populations (OOA) showed similar percentage of TEs  
288 with evidence of selection, 18/103 (17.5%) and 22/154 (14.2%) respectively (Chi-square,  
289  $p$ -value = 0.488, S5 Table), suggesting that both datasets could be enriched for adaptive  
290 TEs. Indeed, 10 of these 41 TEs were previously found to show evidence of positive  
291 selection (Table 1).  
292

293 **Table 1. 65 TEs showing evidence of selection (ES).**

| Freq group  | Flybase ID          | Evidence of selection              | Reference                                              | GO enrichment/ Gene association                                      |
|-------------|---------------------|------------------------------------|--------------------------------------------------------|----------------------------------------------------------------------|
| OOA         | FBti0018916         | iHS                                | This work                                              | -                                                                    |
|             | FBti0018937         | iHS                                | This work                                              | RtS/ olfactory                                                       |
|             | FBti0019056         | Fst/ CSTV                          | This work/ Kapun et al. 2018                           | RtS                                                                  |
|             | FBti0019065         | Fst, nSL/fTE/ CSTV                 | This work/ Gonzalez et al. 2008/ Kapun et al 2018      | RtS / xenobiotic                                                     |
|             | FBti0019079         | H12                                | This work                                              | RtS                                                                  |
|             | FBti0019081         | nSL                                | This work                                              | RtS                                                                  |
|             | FBti0019279         | H12                                | This work                                              | RtS/ alcohol, olfactory                                              |
|             | FBti0019354         | iHS/allele age                     | This work/ Blumenstiel et al. 2014                     | - /alcohol                                                           |
|             | FBti0019453         | H12/nSL                            | This work                                              | RtS /circadian                                                       |
|             | FBti0019457         | Fst/nSL                            | This work                                              | -                                                                    |
|             | FBti0019601         | H12                                | This work                                              | - / xenobiotic                                                       |
|             | FBti0019604         | H12                                | This work                                              | RtS/ alcohol, heavy metal, olfactory                                 |
|             | FBti0019627         | Fst, iHS, H12/<br>Phenotypic       | This work/ Mateo et al. 2014                           | RtS / xenobiotic, diapause                                           |
|             | FBti0019632         | H12                                | This work                                              | RtS                                                                  |
|             | FBti0019657         | iHS                                | This work                                              | RtS                                                                  |
|             | FBti0020036         | iHS                                | This work                                              | RtS/ agresiveness, hypoxia, olfactory                                |
|             | FBti0020057         | H12/nSL                            | This work                                              | - / immunity, xenobiotic, diapause                                   |
|             | FBti0020091         | iHS                                | This work                                              | -                                                                    |
|             | FBti0020096         | iHS/ nSL                           | This work                                              | -                                                                    |
|             | FBti0020116         | H12                                | This work                                              | RtS/ olfactory                                                       |
| FBti0020149 | H12, nSL/Allele age | This work/ Blumenstiel et al. 2014 | - / olfactory                                          |                                                                      |
| FBti0020393 | iHS                 | This work                          | RtS/heavy metal                                        |                                                                      |
| AF-<br>OOA  | FBti0018880         | H12, nSL/ iHS/<br>Phenotypic       | This work/ González et al 2008, 2009/ Guio et al. 2014 | - /immunity, xenobiotics, alcohol, circadian, starvation, heat-shock |
|             | FBti0019010         | iHS/ Fst                           | This work/ Mateo et al. 2018                           | RtS                                                                  |
|             | FBti0019071         | Fst                                | This work                                              | -                                                                    |
|             | FBti0019112         | iHS, H12, nSL/ CSTV                | This work/ Kapun et al 2018                            | RtS/ alcohol, olfactory, starvation                                  |
|             | FBti0019133         | H12                                | This work                                              | RtS/ agresiveness                                                    |
|             | FBti0019372         | H12                                | This work                                              | RtS/ olfactory, pigmentation                                         |
|             | FBti0019378         | Fst                                | This work                                              | RtS                                                                  |
|             | FBti0019613         | H12                                | This work                                              | RtS                                                                  |
|             | FBti0019617         | iHS                                | This work                                              | RtS/ alcohol, diapause                                               |
|             | FBti0019677         | H12                                | This work                                              | - /starvation, agresiveness                                          |
|             | FBti0019771         | Fst                                | This work                                              | -                                                                    |
|             | FBti0019975         | iHS                                | This work                                              | -                                                                    |
|             | FBti0020086         | Fst, iHS/ Allele age               | This work/ Blumenstiel et al. 2014                     | RtS / circadian, xenobiotic                                          |
|             | FBti0020114         | iHS, nSL                           | This work                                              | -                                                                    |
|             | FBti0020146         | Fst                                | This work                                              | RtS                                                                  |



|            |             |                                               |                                                                                                                                     |                                                                                |
|------------|-------------|-----------------------------------------------|-------------------------------------------------------------------------------------------------------------------------------------|--------------------------------------------------------------------------------|
|            | FBti0060715 | iHS                                           | This work                                                                                                                           | RtS                                                                            |
|            | FBti0061417 | H12                                           | This work                                                                                                                           | RtS/ heavy metal                                                               |
|            | FBti0061506 | iHS                                           | This work                                                                                                                           | RtS/ hypoxia, immunity, olfactory, xenobiotics                                 |
| NA-AF      | FBti0019430 | H12/ TajimaD/ fTE/<br>allele age/ Phenotypic/ | This work/ Kofler et al.<br>2012/González et al 2008/<br>Blumenstiel et al. 2014/<br>Aminetzach et al. 2005,<br>Schmidt et al. 2010 | - / immunity, hypoxia                                                          |
| OOA        | FBti0019360 | Fst                                           | Mateo et al. 2018                                                                                                                   | -                                                                              |
|            | FBti0020125 | Allele age/ CSTV                              | Blumenstiel et al. 2014/<br>Kapun et al 2018                                                                                        | RtS/olfactory                                                                  |
|            | FBti0019386 | CL test, TajimaD<br>Phenotypic                | Ullastres et al. 2015                                                                                                               | RtS                                                                            |
|            | FBti0019985 | TajimaD, iHS, H12<br>Phenotypic               | Merenciano et al 2016                                                                                                               | RtS, diapause                                                                  |
|            | FBti0020155 | Phenotypic                                    | Zhu et al. 2014                                                                                                                     | RtS/ immunity, starvation, alcohol                                             |
|            | FBti0020046 | Allele age                                    | Blumenstiel et al. 2014                                                                                                             | - / immunity                                                                   |
| AF-<br>OOA | FBti0019276 | CGTV                                          | Kapun et al 2018                                                                                                                    | RtS                                                                            |
|            | FBti0019344 | Fst                                           | Mateo et al. 2018                                                                                                                   | RtS                                                                            |
|            | FBti0019564 | TajimaD                                       | Kofler et al. 2012                                                                                                                  | RtS                                                                            |
|            | FBti0019611 | CGTV                                          | Kapun et al 2018                                                                                                                    | Nsd, locomotion, chemotaxis /<br>olfactory, pigmentation, alcohol,<br>diapause |
|            | FBti0019082 | TajimaD                                       | Kofler et al. 2012                                                                                                                  | RtS / starvation                                                               |
|            | FBti0060443 | CGTV                                          | Kapun et al 2018                                                                                                                    | RtS / alcohol                                                                  |
| NA-AF      | FBti0019200 | Allele age                                    | Blumenstiel et al. 2014                                                                                                             | RtS / starvation                                                               |
| LowFreq    | FBti0061742 | TajimaD                                       | Kofler et al. 2012                                                                                                                  | -                                                                              |
| Fixed      | FBti0019199 | Allele age                                    | Blumenstiel et al. 2014                                                                                                             | RtS/ alcohol, pigmentation                                                     |
|            | FBti0020082 | Allele age                                    | Blumenstiel et al. 2014                                                                                                             | RtS                                                                            |
|            | FBti0019170 | fTE/ Phenotypic                               | González et al 2008/ Le<br>Manh et al. 2017                                                                                         | RtS/ olfactory                                                                 |
|            | FBti0019655 | TajimaD                                       | Kofler et al. 2012                                                                                                                  | - /                                                                            |
|            | FBti0020329 | TajimaD                                       | Kofler et al. 2012                                                                                                                  | RtS / hypoxia                                                                  |
|            | FBti0059793 | TajimaD                                       | Kofler et al. 2012                                                                                                                  | - /immunity, oxidative, starvation.<br>alcohol, hypoxia                        |
|            | FBti0060388 | TajimaD                                       | Kofler et al. 2012                                                                                                                  | RtS                                                                            |
|            | FBti0060479 | TajimaD                                       | Kofler et al. 2012                                                                                                                  | RtS                                                                            |
|            | FBti0062283 | TajimaD                                       | Kofler et al. 2012                                                                                                                  | RtS/ immunity, alcohol                                                         |
|            | FBti0063191 | TajimaD                                       | Kofler et al. 2012                                                                                                                  | RtS/ alcohol, diapause, immunity,<br>oxidative, starvation, xenobiotic         |

294 The 41 TEs identified in this work are listed first. Note that for ten of these TEs there was previous  
 295 evidence suggesting that are evolving under positive selection. The 25 TEs identified only in other  
 296 studies are also listed. CSTV: Correlation with spatio-temporal variables. RtS: response to stimulus,  
 297 Nsd: Nervous system development.

298 **Candidate adaptive TEs are associated with genes involved in stress response,**  
299 **behavior, and development**

300 We used the GO terms of genes nearby candidate adaptive TEs to test whether they were  
301 enriched for any biological processes. Besides, the 41 TEs identified in this work, we also  
302 consider 24 TEs that have been previously identified as candidate adaptive TEs based on  
303 different approaches such as Tajima's D, and age of allele neutrality test (Table 1). In total,  
304 we analyzed 83 genes nearby 65 TEs (Table 1, S8A Table). We found four significant  
305 clusters (enrichment score > 1.3) according to DAVID [49, 50] functional annotation tool:  
306 response to stimulus, behavior, development, and localization and transport (Fig 6A, S8A  
307 Table). We then analyzed whether the 363 genes nearby the 300 HighFreq TEs were  
308 enriched for similar biological processes (see Material and Methods). We identified 20  
309 significant clusters (S8A Table). Among clusters showing the highest enrichment scores we  
310 also found GO terms related with response to stimulus, behavior and learning, and  
311 development (Fig 6B). Finally, genes nearby OOA and AF-OOA TEs were also enriched  
312 for similar biological functions (S5 Fig, S8C-D Tables). Note that the behavior-related  
313 clusters slightly differed among the datasets: genes nearby TEs with evidence of positive  
314 selection were enriched for aggressiveness genes, genes nearby HighFreq TEs and AF-  
315 OOA TEs were enriched for olfactory genes, and genes nearby OOA TEs for circadian and  
316 locomotor behavior genes (Fig 6 and S5 Fig).

317 To gain more insight into the function of genes nearby the candidate adaptive TEs, we  
318 looked whether they were previously described as candidate genes for several fitness-  
319 related traits (S9 Table, see Material and Methods). Among the 83 genes nearby the 65  
320 candidate adaptive TEs, 19 have previously been identified as candidates for stress-related  
321 phenotypes: 11 genes were associated with immunity and 14 with alcohol exposure (Fig

322 6B, S10A Table). In addition, we also found enrichment of genes related with behavioral  
323 phenotypes such as olfaction and aggressiveness, and with pigmentation (Fig 6B, S10A  
324 Table). Similar enrichments were found for genes located nearby the 300 High Freq TEs  
325 and for the genes located nearby the OOA and the AF-OOA datasets (S5 Fig, S10C-D  
326 Tables). Among the 363 genes nearby HighFreq TEs, 171 have previously been identified  
327 as candidates for stress-related phenotypes, such as desiccation, heavy-metal and alcohol,  
328 and/or behavior-related phenotypes (Fig 6B).

329 Overall, we found that genes nearby the 300 HighFreq TEs are enriched for similar  
330 biological processes as genes nearby a dataset of TEs with evidence of positive selection:  
331 response to stimulus, behavior and learning, and development Fig 6A, S8 Table).

332 Moreover, 47% of the genes nearby the 300 HighFreq TE dataset have previously been  
333 identified as candidate genes for several stress- and/or behavior-related traits (Fig 6B, S10  
334 Table).

335

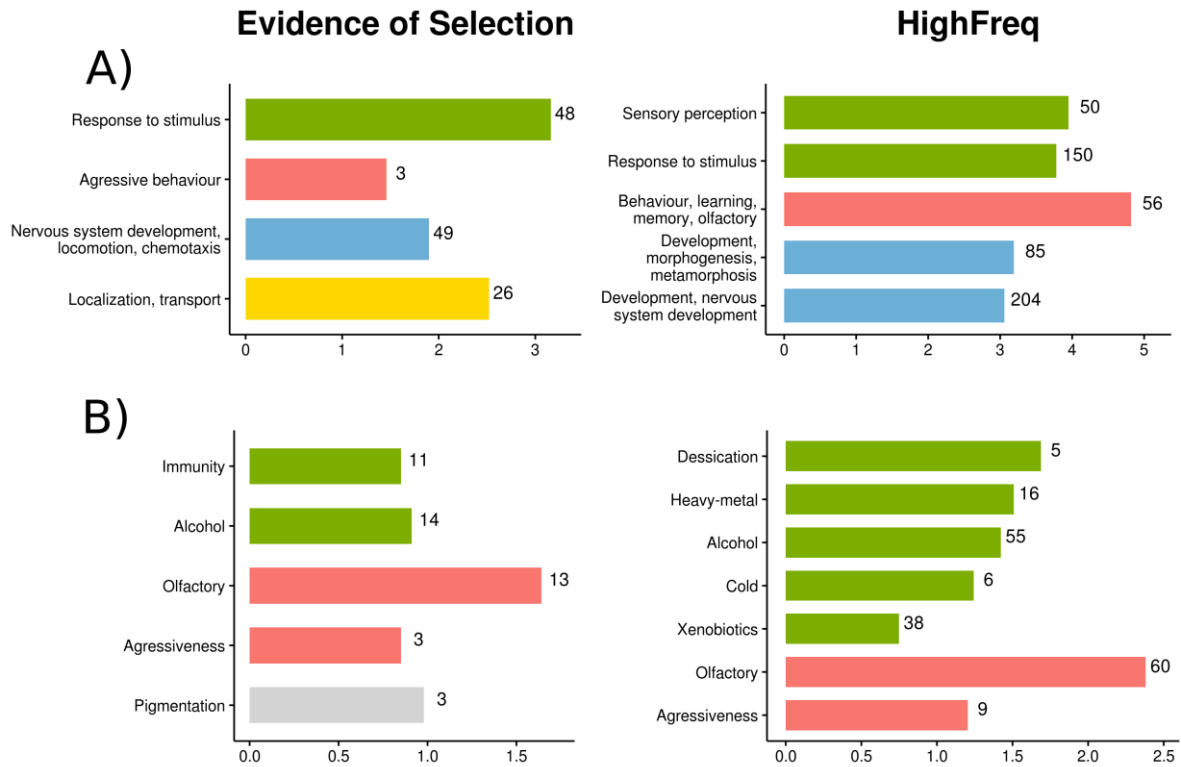

336

337 **Fig 6. Functional Enrichment analysis of genes nearby TEs showing Evidence of**  
 338 **Selection (in this or previous works) and HighFreq TEs.** Bar colors indicates similar  
 339 biological functions of the DAVID clusters (A) and the fitness-related traits (B): Green: stress  
 340 response, Red: behavior, Blue: development Yellow: transport, Grey: pigmentation. A) Significant  
 341 gene ontology clusters according to DAVID functional annotation tool (enrichment score > 1.3).  
 342 For genes nearby HighFreq TEs, only top five clusters are showed. The horizontal axis represent  
 343 DAVID enrichment score (see S8A and S8B Tables for details). B) Significantly overrepresented  
 344 fitness-related genes according to previous genome association studies. All FDR corrected p-values  
 345 < 0.05, Chi-square ( $\chi^2$ ) test (see S10A and S10B Tables for details). The horizontal axis represents  
 346 the  $\log_{10}(\chi^2)$ . In both, A) and B), numbers nearby each bar indicate total number of genes in that  
 347 cluster/category.

348

### 349 Candidate adaptive TEs correlate with the expression of nearby genes

350 We tested whether there was a correlation between the presence of the candidate adaptive  
 351 TEs and the expression of nearby genes using the *Matrix eQTL* package [51]. We used gene  
 352 expression data from Huang *et al.* [52] and *T-lex2* annotations for 140 DGRP lines in order

353 to determine whether the presence of a TE was correlated with the expression level of the  
 354 nearby genes (< 1kb). We calculated correlations for 638 TEs located at high  
 355 recombination regions and we found that 19 of them showed significant eQTL associations  
 356 (S11 Table). TEs present at high frequencies contained more significant eQTLs than  
 357 expected (38% vs 11%, Chi-Square test, p-value < 0.0001) (Table 2). We observed the  
 358 same significant tendency when considering only positive correlations (the presence of the  
 359 TE correlates with increased expression of the nearby gene) or only negative correlations  
 360 (the presence of the TE correlates with reduced expression of the nearby gene) (Table 2).  
 361 These results remained significant after FDR correction (50% vs 11% expected, Chi-Square  
 362 test, p-value < 0.0001, Table 2). Of the 19 TEs showing significant eQTL associations, 11  
 363 also showed signatures of selection (S11 Table).

364 **Table 2. Correlation between TEs and expression level of nearby genes.**

| TEs                     |                             | HighFreq |          | Fixed |     | LowFreq |     | Private |         |
|-------------------------|-----------------------------|----------|----------|-------|-----|---------|-----|---------|---------|
| <b>All TEs analyzed</b> |                             | 70       | 11%      | 192   | 30% | 376     | 59% | 25      | 4%      |
| <b>Significant TEs</b>  | <b>All</b>                  | 19       | 38% (**) | 12    | 24% | 19      | 38% | 4       | 8%      |
|                         | <b>Positive correlation</b> | 15       | 37% (**) | 11    | 27% | 15      | 37% | 4       | 10% (*) |
|                         | <b>Negative correlation</b> | 11       | 32% (**) | 8     | 24% | 15      | 44% | 3       | 9% (*)  |
|                         | <b>FDR&lt;0.05</b>          | 5        | 50% (**) | 0     | 0%  | 5       | 50% | 0       | 0%      |

365 Number of TEs located at high recombination regions for which correlations were calculated (All  
 366 TEs analyzed), and number of TEs with significant correlations for each frequency group are  
 367 given (Significant TEs). Frequency groups were determined based on their frequency in the DGRP  
 368 population. LowFreq TEs were further classified as Private if only one strain was containing the  
 369 TE. Note that TEs are classified as fixed if they are present in > 95% of the strains analyzed, thus  
 370 for some of these TEs there could be strains that do not contain the insertion. Percentages  
 371 regarding the total number of TEs in that frequency category are also given. Chi-square test \* p-  
 372 value < 0.05 and \*\* p-value < 0.0001.

373

374 We finally checked whether private TEs (those present in only one DGRP strain according  
375 to *T-lex2*) were also present among the significant eQTL as expected by the “rare alleles of  
376 large effect” hypothesis [53]. We found a small, but still significant set of private TEs with  
377 significant correlation with the expression of nearby genes (10% and 9% vs 4% expected,  
378 Chi-Square test, p-value < 0.050) (Table 2), which is in agreement with previous reports  
379 [54].

### 380 **Genomic location, order, and family enrichment of TEs present at high frequencies in** 381 **high recombination regions**

382 We tested whether the genomic location of HighFreq TEs differed from the location of all  
383 TEs in the genome. We classified the TEs as present in intergenic, promoter, or genic  
384 regions (see Material and Methods). We found no differences between the distributions of  
385 HighFreq vs all TEs in the genome (Chi-square test, p-values > 0.05, Fig 7A, S12A Table).  
386 Similar results were obtained when we considered the three HighFreq TEs subgroups  
387 (S12A Table). We further classified intragenic TEs in exonic, UTRs, 1<sup>st</sup> intron, and other  
388 introns. Only HighFreq TEs were enriched in UTR regions (Chi-square test, p-value <  
389 0.043) (Fig 7B, 12B Table).

390 We also checked whether the proportion of DNA, LTR, and nonLTR TE orders differed  
391 between HighFreq TEs and all TEs in the genome. We found that the HighFreq group  
392 contains a larger proportion of non-LTR TEs (42% vs 31% and 33%, Chi-square test, p-  
393 value = 5.73e-06, Fig 7C, S13 Table). Moreover, when considering HighFreq subgroups we  
394 found that OOA TEs also contain a large proportion of non-LTR elements (53% vs 31%  
395 and 33%, Chi-square test, p-value = 1.79e-11) while the AF-OOA TEs contain more LTR  
396 elements (50% vs 39%, Chi-square test, p-value = 1.08e-02) (Fig 7C, S13 Table).

397 Regarding TE families, we found that the HighFreq TEs contain a larger proportion of  
 398 several families including *jockey*, *297*, *BS* and *pogo* families (S14 Table). When  
 399 considering only OOA TEs, we found a larger proportion of several families including  
 400 *jockey*, *F* family, and *BS*, while in the AF-OOA there was a larger proportion of *297*,  
 401 *Quasimodo*, and *opus* (Chi-square test, Bonferroni corrected p-values < 0.05) (S14 Table).

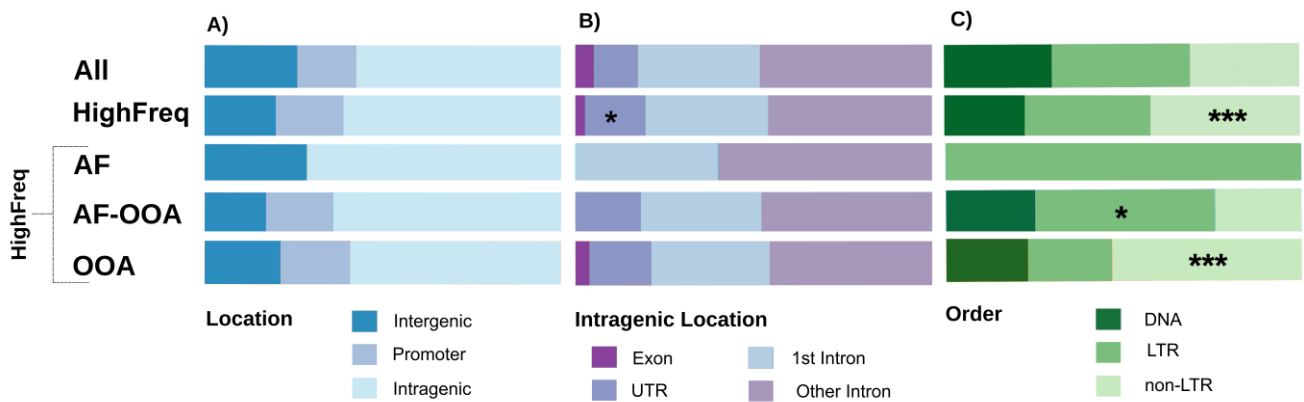

402

403 **Fig 7. Characteristics of the HighFreq TEs.** A) TE location regarding the nearest gene. B)  
 404 Location of intragenic TEs. C) TE order. \*: p-value < 0.05. \*\*\*: p-value < 0.001 (Chi-square test).

## 405 Discussion

406 In this work, we identified 300 TEs present at high frequencies in natural populations, and  
 407 located in genomic regions with high recombination, where the efficiency of selection is  
 408 high [37, 38]. Most of these TEs are young insertions suggesting that they have increased in  
 409 frequency relatively fast (Fig 3). In addition, these insertions are longer compared with  
 410 other TEs in the genome, also suggesting an adaptive role because long insertions are more  
 411 likely to act as substrates for ectopic recombination leading to chromosome rearrangements  
 412 that are often deleterious [16, 41, 42] (Fig 4). Our dataset of 300 putatively adaptive TEs,  
 413 contains all the insertions present at high population frequencies that have previously been  
 414 identified as putatively adaptive [7, 21, 55-63]. Note that we, and others, have found

415 signatures of positive selection and/or functional evidence for the adaptive role of 53 of the  
416 300 putatively adaptive TEs identified in this work, further suggesting that this dataset is  
417 enriched for adaptive insertions (Table 1). The other 12 TEs that have been previously  
418 identify as candidate adaptive TEs were fixed or present at low frequencies in the  
419 populations analyzed in this study, and thus were not included in our dataset of high  
420 frequent TEs (Table 1).

421 Although we looked for evidence of hard and soft sweeps, and for evidence of population  
422 differentiation using the  $F_{ST}$  statistic, adaptive mutations could show other signatures of  
423 selection as well [1, 2, 64]. Polygenic adaptation, which should lead to modest changes in  
424 allele frequency at many loci, would be overlooked by the more conventional methods for  
425 detecting selection used in this study [65]. A recent work used  $F_{ST}$  and gene set enrichment  
426 analysis to find evidence of polygenic adaptation in European *D. melanogaster* populations  
427 [63]. In addition, analysis of environmental correlations between allele frequencies and  
428 ecological variables could also lead to the identification of additional TE insertions under  
429 positive selection [66-69]. Thus, further analysis could lead to the identification of  
430 signatures of selection in other insertions in our dataset besides the 53 insertions that  
431 showed signatures of selection identified in this work (Table 1).

432 Our dataset of 300 putatively adaptive TEs allowed us investigating global patterns in the  
433 biological functions that might be affected by TE-induced adaptive mutations in the *D.*  
434 *melanogaster* genome. Previous genome-wide screenings looking for adaptive TE  
435 insertions identified a small number of candidates that preclude the identification of the  
436 putative traits under selection [7, 8, 21, 61]. In this work, we found that genes nearby  
437 putatively adaptive TEs are enriched for response to stimulus, development, and behavioral  
438 and learning functions (Fig 6). Through literature searches, we found that 41% (148 out of



439 363) of these genes have previously been identified as candidate stress-related genes  
440 including xenobiotic stress, desiccation, and cold stress (Fig 6). If we focus on the subset of  
441 TEs that are likely to be involved in out-of-Africa adaptations, we found similar gene  
442 functional enrichments (S5 Fig). Interestingly, circadian behavior gene functions are  
443 enriched in this dataset of TEs, consistent with adaptation to seasonal changes in daylight  
444 experienced by flies in their out-of-Africa expansion [70]. Thus, our results showed that  
445 TE-induce adaptive mutations are mainly likely to contribute to stress-response,  
446 developmental, and behavioral traits. Although these traits have previously been identified  
447 as targets of natural selection, our results point to the most likely causal variant rather than  
448 to a group of linked SNPs [71-73]. Thus, although challenging and time-consuming,  
449 follow-up functional analysis of these adaptive mutations should confirm their causal role,  
450 as we, and others, have already demonstrated in the past [55-60, 62].

451 Most of the signatures of positive selection found in the regions flanking the putatively  
452 adaptive insertions were continent specific (Fig S3B). These results suggest that a  
453 significant proportion of the 300 putatively adaptive TEs could be involved in local  
454 adaptation. Thus, it is likely that by exploring more natural populations we could identify  
455 additional adaptive insertions. We are also missing TEs that could be playing a role in  
456 seasonal and altitudinal adaptation, as both dimensions have been shown to be relevant for  
457 *D. melanogaster* [74-76]. Finally, our study is also limited to those insertions present in the  
458 reference genome. Although there are several packages that infer the presence of *de novo*  
459 TE insertions in genome sequencing data, none of them provides the precise genomic  
460 coordinates of the insertions, which result in inaccurate TE frequency estimations [10, 77].  
461 In addition, the size and the age of the *de novo* insertions cannot be estimated hindering the  
462 characterization of putatively adaptive insertions [77, 78]. Long-read sequencing

463 techniques should, in the near future, help overcome this limitation and allow the  
464 community to investigate the contribution of non-reference TE insertions to adaptive  
465 evolution [79].

466 We also found that the presence of 19 of the candidate adaptive TEs correlated with  
467 changes in expression, both up-regulation and down-regulation, of nearby genes (Table 2  
468 and S11 Table). For four of these TEs, *FBti0018880*, *FBti0019627*, *FBti0019386*, and  
469 *FBti0019985*, changes in expression of the nearby genes have also been reported based on  
470 allele-specific expression and/or qRT-PCR experiments, and further shown to be associated  
471 with changes in fitness-related traits [56-59, 80]. In addition to these 19 insertions, another  
472 four TEs *FBti0020119*, *FBti0020057*, *FBti0018883*, and *FBti0020137* were associated with  
473 allele-specific expression changes [80]. Thus, overall, 23 insertions are associated with  
474 changes of expression of nearby genes, which at least in four cases lead to changes in  
475 fitness-related traits. Note that because 41% of the genes nearby candidate adaptive TEs are  
476 candidates for stress-related phenotypes, it could be that changes in expression are only  
477 induced by the TEs in response to stress.

478 Overall, we identified 300 TE insertions likely to be involved in adaptive evolution as  
479 suggested by their population frequencies, age, size, and presence of signatures of selection  
480 in a subset of them. These TEs substantially add to the list of genetic variants likely to play  
481 a role in adaptation in *D. melanogaster*. Functional profiling of these candidates should  
482 help elucidate the molecular mechanisms underlying these mutations, and confirm their  
483 adaptive effect on the traits identified.

484

## 485 **Material and Methods**

### 486 **Dataset**

487 We analyzed available *D. melanogaster* genome sequencing datasets from 91 samples  
488 collected in 60 natural populations distributed worldwide (Fig 1 and S1 Table). Most  
489 samples (83) were generated using pool-sequencing, while the remaining eight samples  
490 came from individually sequenced strains. The distribution of populations across continents  
491 was: one from Asia, 39 from Europe, 14 from North America, five from Oceania, and one  
492 from Africa. The African population was collected in Zambia, the ancestral range of the  
493 species [81]. For this work, we only used the 67 Zambian strains without any European  
494 admixture [81]. All data was downloaded from the NCBI Sequence Read Archive (SRA)  
495 from published projects as of April 2016, and from data available in our laboratory (S1  
496 Table). Note that we attempted to include five more samples in our dataset, but we were  
497 unable to estimate TE frequencies in these samples. These samples were from Queensland  
498 and Tasmania [71], Winters [82], Vienna [83], and Povia de Varzim [61].

### 499 **Transposable element frequency estimation**

500 To estimate TE population frequencies, we used *T-lex2*, a computational tool that works  
501 both with individual genomes and with pooled samples. *T-lex2* combines the genotyping  
502 information obtained for each individual genome to calculate the population frequency,  
503 while for pooled samples the frequency is directly estimated from the number of reads  
504 providing evidence for the presence and for the absence of each insertion [31]. Population  
505 frequencies for 34 European populations estimated using *Tlex-2* were obtained from Mateo  
506 *et al.*[63] and Kapun *et al.*[47]. We used *T-lex2* [31] to estimate the population frequency in  
507 the other 26 available populations (six populations sequenced as individual genomes, and

508 20 populations sequenced as pooled samples). We first downloaded genomic coordinates of  
509 all the annotated TEs (5,416 TEs) from FlyBase r6.04 [84, 85]. 2,234 of the 5,416 TEs  
510 belong to the INE family that has been inactive for the past 3- 4.6 Myr [86], and were  
511 discarded. From the 3,182 non-INE TEs, we excluded nested TEs, TEs flanked by other  
512 non-INE TEs (100bp on each side of the TE), and TEs that are part of segmental  
513 duplications, because *T-lex2* does not provide accurate frequency estimates for these TEs  
514 [31]. After these filtering steps we end up with 1,630 TEs. For 108 of the 1,630 TEs we  
515 used the corrected genomic coordinates as described by Fiston-Lavier *et al.* [31]. *T-lex2*  
516 parameters were set to default except for read length and the use of paired reads that were  
517 specific to each dataset.

518 For the eight individually-sequenced populations, *T-lex2* was able to calculate frequencies  
519 for the 1,630 TEs in most of the strains (S6 Fig). Indeed, we only considered a TE  
520 frequency if we had data from at least 9 strains in a given population, as this is the smallest  
521 number of strains in a sample (S6 Fig). For the 83 samples that were pool-sequenced, we  
522 only considered frequencies calculated with 3 to 90 reads. These minimum and maximum  
523 thresholds were selected after comparing the distribution of reads in the 48 DrosEU  
524 samples to avoid false positives (very low number of reads) or an excess of coverage due to  
525 non-unique mapping or spurious reads [47] (S7 Fig). For one population, we have both  
526 individually sequenced genomes, and pooled-sequenced genomes. Using data of the  
527 individually sequenced population of Stockholm [63] we found a high correlation with the  
528 pool-sequenced data of the same population (Pearson correlation coefficient  $r=0.98$ ,  $p$ -  
529 value  $< 2.2e-16$ , S8 Fig), which indicates that there is no bias due to the sequencing  
530 strategy when calculating the frequencies using *T-lex2*. For most TEs we could estimate  
531 frequency in most of the samples (S9 Fig). We only discarded 15 TEs where *T-lex2*

532 estimated frequencies for less than 10 out of the 91 samples, ending up with a dataset of  
533 1,615 TEs.

534 We considered a TE to be located in high recombination regions when the two available  
535 recombination estimations for *D. melanogaster* [87, 88] were greater than 0 in the region  
536 where the TE is inserted (S2 Table).

### 537 **Detecting inversions and correcting TE frequencies**

538 We analyzed the effect of inversions in TE frequency estimations. We focused on the  
539 cosmopolitan inversions: In(2L)t, In(2R)Ns, In(3L)P, In(3R)K, In(3R)Mo, In(3R)Payne,  
540 and In(3R)C (S15 Table) [75]. 358 TEs are located inside or overlapping with one of these  
541 inversions and 36 TEs are located less than 500kb from an inversion breakpoint. For five  
542 samples, there is data available on the presence/absence data of inversions: Zambia [81],  
543 France [89], North Carolina (DGRP, USA) [90, 91], Italy and Sweden [63]. For all these  
544 datasets, we re-estimated TE frequencies for individual samples by removing the strains  
545 containing an inversion. We also removed strains where a TE was located 500 kb upstream  
546 or downstream of an inversion present in that strain [75]. Removal of strains was done at  
547 the TE level using an *in house* python script. As a result, each TE had a different number of  
548 supporting strains. The frequencies calculated removing strains with inversions were  
549 equivalent to the original ones (Pearson correlation coefficient  $r = 0.99$ ,  $p < 2.2e-16$ , S10  
550 Fig), indicating that the effect of inversions on TE frequency is rather small in our dataset.

### 551 **TE age and TE length ratio**

552 We used a phylogeny-based approach to estimate the age of each TE within each family for  
553 the 5,416 TEs annotated in the reference genome. The age was estimated as the unique  
554 number of substitutions shared between the two closest TEs assuming that they all derived

555 from a common ancestral TE, *i.e.* the divergence between closest TEs. Hence, this approach  
556 estimates the time since last activity for each TE. Note that activity includes not only  
557 transposition but also other genomic TE movements such as the ones caused by  
558 duplications.

559 When the age estimates were calculated, TE annotations were only available for the release  
560 4. Thus, we started by detecting and annotating the TE families and subfamilies in the  
561 release 5 of the reference *D. melanogaster* genome. We used the *de novo* homology based  
562 approach developed in the REPET suite to build a library of TE consensus [92]  
563 (<https://urgi.versailles.inra.fr/Tools/REPET/>). The consensus are proxies of the TE family  
564 and subfamily canonical sequences. We then annotated each consensus by blasting them  
565 against the TE canonical sequences from the Berkeley Drosophila Genome Project  
566 ([www.fruitfly.org/](http://www.fruitfly.org/)). Each TE sequence was then aligned to its set of annotated TE  
567 consensus using a global alignment tool from the REPET suite, called RefAlign. The  
568 RefAlign launches pairwise alignments avoiding spurious alignments induced by internally  
569 deleted TE sequences [30, 93]. All pairwise alignments from the same TE family were re-  
570 aligned to generate profiles using Clustalw v2.0.10 [94]. We manually curated each profile:  
571 we removed shared substitutions and indels using another tool in the REPET suite called  
572 *cleanMultipleAlign.py* [30, 93]. A limitation of alignment-based methods is that short TEs  
573 could generate misalignments. Hence, to reduce the impact of misalignments 25 TEs  
574 shorter than 100bp were removed. For eight TE families (*aurora*, *BS4*, *frogger*, *R1-2*,  
575 *Stalker3*, *TART-B*, *TART-C*, and *Xanthias*) composed by less than three copies, we failed to  
576 estimate the divergence of the copies and were not considered in this study (11 copies in  
577 total). Some profiles were re-aligned using MAFFT v.7 in order to refine conserved regions  
578 between TE sequences [95]. For each TE profile, a phylogenetic tree was inferred using the

579 phyML program with the Hasegawa–Kishino–Yano (HKY) model, with different base  
580 frequencies. We used the BIONJ technique to build the starting tree and optimized the  
581 topology and branch lengths [96]. Finally, the terminal branch lengths were extracted using  
582 the Newick Utilities v.1.6 and were used as a proxy for the age of the insertions [97]. We  
583 ended up with the age estimates for 5,389 TE sequences from 116 TE families belonging to  
584 all TE orders.

585

586 We analyzed the length of the TEs by calculating the “TE length ratio (%)” defined as the  
587 length of each TE divided by the family canonical length and expressed in percentage.  
588 Then, we applied the Wilcoxon rank sum test for determining whether the distribution of  
589 the TE Length Ratio values was different between different TE classes.

### 590 **Signatures of selective sweeps**

591 In order to detect signatures of positive selection we applied three different methods for  
592 identifying selective sweeps: *iHS* [44], *H12* [45], and  $nS_L$  [46]. We separately analyzed two  
593 datasets of individually sequenced populations from Europe and North America. For the  
594 EU populations we used sequences from 158 strains belonging to four different  
595 populations: 16 strains from Castellana Grotte (Bari, South Italy) [63], 27 strains from  
596 Stockholm (Sweden) [63], 96 strains from Lyon (France) [89, 98] and 19 strains from  
597 Houten (The Netherlands) [99]. We pooled the sequences from the four European  
598 populations as it has been described that there is no evidence of latitudinal population  
599 structure in European populations [47]. This allowed us to analyse a similar number of  
600 strains in the two continents. For the Sweden and Italian populations, we first obtained the  
601 *vcf* and *bam* files from [47], we filtered out all non-SNP variants and then we used *Shapeit*

602 *v2.r837* [100] for estimating haplotypes (phasing). For the French and Dutch populations  
603 we first downloaded consensus sequences from the Drosophila Genome Nexus (DGN) 1.1  
604 [98], and we then created a *SNP-vcf* file using a custom python script. We then merged all  
605 EU populations in a single *SNP-vcf* file using *vcftools v.0.1.15* [101]. For the NA  
606 population we used the *SNP-vcf* file as provided by the Genetic Reference Panel (DGRP)  
607 for 141 strains collected in Raleigh, North Carolina [90, 91].  
608 *iHS* was calculated using the *iHSComputer* software  
609 (<https://github.com/sunthedeep/iHSComputer>). We created *iHSComputer* input files (*SNPs-*  
610 *TEs* files) by adding the *T-lex2* information to the *SNP-vcf* file. For each TE and each strain  
611 we codified the presence/absence of the TE in a biallelic way and place them in the  
612 midpoint coordinate of the TE. Note that only presence/absence results from *T-lex2* were  
613 taken into account, leaving “polymorphic” and “no data” as missing data positions [31].  
614 The presence of the TE was considered as the ‘derived’ state and the absence as the  
615 ‘ancestral’ state. Since *iHSComputer* runs for each chromosome separately, we created  
616 100kbp-windows recombination files for each chromosome based on the recombination  
617 map from [87]. We standardized *iHS* values according to Voight *et al.* [44] and determined  
618 its significance by comparing *iHS* value for the TEs against the empirical distribution of  
619 *iHS* values for SNPs falling within the first 8-30 base pairs of small introns ( $\leq 65$  bp)  
620 which are considered to be neutrally evolving [102]. Two empirical distributions were  
621 generated: one for the SNPs present at high frequency in the out-of-Africa and in the  
622 African populations, and another one for SNPs present at high frequency in out-of-Africa  
623 populations but present at low frequency in the African population (S11 Fig). TEs with *iHS*  
624 values falling outside the 5th percentile of the corresponding empirical distribution of  
625 neutral SNPs were considered significant.



626 The  $H_{12}$  statistic was calculated using the SelectionHapStats software  
627 (<https://github.com/ngarud/SelectionHapStats/>, [45]. We formatted the *SNPs-TEs* files  
628 previously used in the *iHS* calculation and run the *H12\_H2H1.pyscript* for each TE in the  
629 *singleWindow* mode using 100 SNPs as the window size. We first selected windows in the  
630 top 15% most extreme  $H_{12}$  values. We then checked whether haplotypes in these windows  
631 contained the TE in at least 50% of the strains for at least one of the three most frequent  
632 haplotypes. Only TEs that fulfil this condition were considered significant. Note that 17 out  
633 of the 18 significant TEs are present in the first or second most frequent haplotype.  
634 The  $nS_L$  statistic was calculated using *selscan v1.1* [103]. Input files were generated based  
635 on the *SNPs-TEs* files from the *iHS* calculation. We created one *tped* file for each TE and  
636 removed all strains and positions containing missing data. Extreme  $nS_L$  values were  
637 determined using the *norm* program for the analysis of *selscan* output. Unstandardized  $nS_L$   
638 values were normalized in 10 frequency bins across the entire chromosome and significant  
639  $nS_L$  values were determined using the *--crit-percent* 0.05 parameter.

#### 640 **Population differentiation using $F_{ST}$ for latitudinal distant populations**

641 We calculate the Fixation index ( $F_{ST}$ ) between pairs of latitudinal distant populations for  
642 each of the three continents. We created *vcf* files for the TEs based on *T-lex2* results and  
643 used *vcftools v.0.1.15* [101] for calculating the pairwise  $F_{ST}$  estimator [48]. The pairwise  
644 calculations performed for each continent were: Europe: Italy vs. Sweden [63] and Vesanto  
645 vs. Nicosia [47]; Oceania: Innisfail vs. Yering [104] and Queensland vs. Tasmania [73] and  
646 North America: Maine vs. Florida [73], and Maine vs. Florida [74]. For each pair, we  
647 calculated  $F_{ST}$  values for all TEs and tested them against the empirical distribution of  $F_{ST}$   
648 values of neutral SNPs while controlling for TE frequency in the African population [81].

649 Innisfail, Yering, Maine and Florida SNP callings were obtained from the Dryad Digital  
650 Repository (<http://datadryad.org/resource/doi:10.5061/dryad.7440s>, [74, 104]. Queensland,  
651 Tasmania, Florida and Maine SNP callings from Reinhardt *et al.* [73] were provided by Dr.  
652 Andrew Kern. Italy and Sweden SNP callings were obtained from Mateo *et al.* [63].  
653 Vesanto and Nicosia SNP callings were obtained from Kapun *et al.* [47].  $F_{ST}$  values for  
654 neutral SNPs were also calculated using *vcftools v.0.1.15* [101]. Then, for each pairwise  
655 comparison we created two empirical distributions of  $F_{ST}$  values of neutral SNPs: one for  
656 SNPs that were at low frequency in Zambia and other for SNPs that were at high frequency  
657 in Zambia.  $F_{ST}$  values of TEs at high frequency in Zambia were compared with the  
658 distribution of neutral SNPs  $F_{ST}$  at high frequency in Zambia and  $F_{ST}$  values of TEs at low  
659 frequency in Zambia were compared with the low frequency SNPs distribution. We  
660 considered a TE to be significantly differentiated when its  $F_{ST}$  value was greater than the  
661 percentile 95th of the corresponding empirical distribution.  
662 Overall, we calculated  $F_{ST}$  values for 254 TEs in at least one pair of populations and we  
663 found 78 of them showing extreme values when comparing with the distribution of  $F_{ST}$   
664 from neutral SNPs (S7 Table). 67 of these 78 TEs were consistently present at high  
665 frequencies in populations located in high latitudes or in low latitudes. 43 of the 67 TEs  
666 were present at high frequencies in low latitude populations in at least one pairwise  
667 comparison, and 24 TEs were present at high frequencies in high latitude populations in at  
668 least one pairwise comparison (S7 and S16 Tables). Finally, to be conservative, we only  
669 considered those TEs with significant  $F_{ST}$  values in at least two populations and always  
670 present at high frequencies in populations located in high or low latitude (concordant  $F_{ST}$ ).

671 **TE location**

672 We analyzed whether TEs were located at specific regions in the genome regarding the  
673 nearest gene. We used TEs and gene coordinates from FlyBase r6.04 [84, 85] and  
674 considered both coding and non-coding genes. For each TE, we determined whether it was  
675 located inside a gene or in an intergenic region. We further classify the TEs located in  
676 intergenic regions in those located at more or less than 1kb of the nearest gene. For TEs  
677 present inside a gene we further determined the class site overlapping with the TE  
678 annotation: *Exon*, *UTR*, *Intron*. If the TE is inserted in an intron, we checked whether it was  
679 inserted in the first intron, where is more likely to affect expression [105, 106].

680

681 **Expression quantitative trait loci (eQTL) analysis**

682 We use *Matrix eQTL* v2.1.1 [51] to calculate correlations between the presence/absence of  
683 the TEs and the expression of nearby genes. We used expression data from the DRGP lines  
684 (Raleigh, North Carolina, [52]) as available in the DGRP2 repository  
685 (<http://dgrp2.gnets.ncsu.edu/data.html>) and the presence/absence TE information for the  
686 DGRP lines for which *T-lex2* was successfully run (see above). *T-lex2* identified TEs for  
687 1,603 in the DRGP lines and 1,177 of them contain at least one gene at less than 1kb of any  
688 of the two junction coordinates of the TEs. One line (RAL-591) was not present in the  
689 expression data, so we ended up with 140 lines in the dataset. For each line, we used the  
690 average of the normalized gene expression value from the two replicates and analyzed  
691 female and male data separately. For the genotyping data, we used both the start and the  
692 end coordinates of the 1,615 TE as positions in the genome and codified the absence (0),  
693 polymorphic (1), presence (2) and no data (NA) from *T-lex2* output using a custom python

694 script. *Matrix eQTL* was run with default parameters, applying only the *Linear* model and  
695 with a *cisDist=1000*, meaning that we considered only genes that were at less than 1kb  
696 from any of the junction coordinates of the TE. We then evaluated the significance of the  
697 correlations as provided by the *Matrix eQTL* software and we considered TEs that were  
698 significant in at least one sex. From the 1,177 analyzed TEs, we kept only the 638 TEs  
699 located at high recombination rate regions and classified them according to their frequency  
700 in the DGRP population as: HighFreq (10% < frequency < 95%), LowFreq (frequency ≤  
701 10%) and Fixed (frequency ≥ 95%). LowFreq TEs were further classified as Private if only  
702 one strain was containing the TE. 235 of the 300 candidate adaptive TEs were included in  
703 the 638 dataset.

704

#### 705 **Functional enrichment analysis**

706 We performed functional enrichment analysis for Gene Ontology (GO) biological process  
707 for the genes nearby TEs using the DAVID functional annotation cluster tool (v.6.8) [49,  
708 50]. Based on TE and gene coordinates from FlyBase r6.04 [84, 85], we selected genes  
709 located at less than 1kb as the ones putatively likely affected by the TEs, since this is the  
710 approximate size of the promoter region in *D. melanogaster* [107]. If there were no genes at  
711 less than 1kb, we selected the closest one. All comparisons were performed using the full  
712 list of genes in *D. melanogaster* as the background. We considered DAVID clusters as  
713 significant when the enrichment score (ES) was higher than 1.3 as described in Huang da *et*  
714 *al.* [49].

715

716 In addition, in December 2016 we searched the literature using PubMed to find publications  
717 that identified genes associated with phenotypic traits studied in the DGRP project  
718 (olfactory behavior, alcohol exposure, desiccation, aggressiveness, cold tolerance,  
719 pigmentation, starvation, mating behavior, and oxidative stress). We also included  
720 phenotypic traits for which there is gene expression data available (heavy-metal stress,  
721 xenobiotic stress, diapause, locomotor behavior, and hypoxia). Finally, we looked for  
722 publications related with immunity, heat-shock stress, and circadian behavior as these three  
723 are relevant adaptive traits in *Drosophila*. We included genome-wide studies (GWAS, QTL,  
724 gene expression, and protein-protein interactions) and candidate-gene studies (S9 Table).  
725 We generated lists of candidate genes for each one of the 17 different fitness-related traits.  
726 We then converted the gene names to Flybase gene identifiers. This step was necessary  
727 because in *D. melanogaster* genes often have more than one name but all genes have a  
728 single Flybase identifier. To construct our final candidate gene lists, we only considered  
729 those genes that were present in two or more independent publications. We then checked  
730 whether the genes nearby the 300 HighFreq TEs, the 65 TEs with evidence of positive  
731 selection, the 174 OOA, and the 111 AF-OOA TEs were present in our candidate gene lists.  
732 We used Chi-square test to determine whether different sets of TEs showed more genes  
733 previously associated with different stress-related and behavior-related traits than expected  
734 by chance.

## 735 **Acknowledgments**

736 We thank members of the González lab for comments on the manuscript. This work was  
737 funded by a grant from the European Commission (H2020-ERC-2014-CoG-647900) and  
738 by the Ministerio de Economía y Competitividad (BFU2014-57779-P).

## 739 **References**

- 740 1. Pardo-Diaz C, Salazar C, Jiggins CD. Towards the identification of the loci of adaptive  
741 evolution. *Methods Ecol Evol.* 2015;6(4):445-64. doi: 10.1111/2041-210X.12324. PubMed PMID:  
742 25937885; PubMed Central PMCID: PMCPMC4409029.
- 743 2. Hoban S, Kelley JL, Lotterhos KE, Antolin MF, Bradburd G, Lowry DB, et al. Finding the  
744 Genomic Basis of Local Adaptation: Pitfalls, Practical Solutions, and Future Directions. *Am Nat.*  
745 2016;188(4):379-97. Epub 2016/09/14. doi: 10.1086/688018. PubMed PMID: 27622873; PubMed  
746 Central PMCID: PMCPMC5457800.
- 747 3. Francois O, Martins H, Caye K, Schoville SD. Controlling false discoveries in genome scans  
748 for selection. *Mol Ecol.* 2016;25(2):454-69. Epub 2015/12/17. doi: 10.1111/mec.13513. PubMed  
749 PMID: 26671840.
- 750 4. Fan S, Hansen ME, Lo Y, Tishkoff SA. Going global by adapting local: A review of recent  
751 human adaptation. *Science.* 2016;354(6308):54-9. doi: 10.1126/science.aaf5098. PubMed PMID:  
752 27846491; PubMed Central PMCID: PMCPMC5154245.
- 753 5. Jeong C, Di Rienzo A. Adaptations to local environments in modern human populations.  
754 *Current opinion in genetics & development.* 2014;29:1-8. Epub 2014/08/19. doi:  
755 10.1016/j.gde.2014.06.011. PubMed PMID: 25129844; PubMed Central PMCID: PMCPMC4258478.
- 756 6. Flood PJ, Hancock AM. The genomic basis of adaptation in plants. *Curr Opin Plant Biol.*  
757 2017;36:88-94. doi: 10.1016/j.pbi.2017.02.003. PubMed PMID: 28242535.
- 758 7. Gonzalez J, Lenkov K, Lipatov M, Macpherson JM, Petrov DA. High rate of recent  
759 transposable element-induced adaptation in *Drosophila melanogaster*. *PLoS Biol.* 2008;6(10):e251.  
760 doi: 10.1371/journal.pbio.0060251. PubMed PMID: 18942889; PubMed Central PMCID:  
761 PMCPMC2570423.
- 762 8. Gonzalez J, Karasov TL, Messer PW, Petrov DA. Genome-wide patterns of adaptation to  
763 temperate environments associated with transposable elements in *Drosophila*. *PLoS Genet.*  
764 2010;6(4):e1000905. Epub 2010/04/14. doi: 10.1371/journal.pgen.1000905. PubMed PMID:  
765 20386746; PubMed Central PMCID: PMCPMC2851572.
- 766 9. Dennis MY, Eichler EE. Human adaptation and evolution by segmental duplication. *Current*  
767 *opinion in genetics & development.* 2016;41:44-52. Epub 2016/09/02. doi:  
768 10.1016/j.gde.2016.08.001. PubMed PMID: 27584858; PubMed Central PMCID: PMCPMC5161654.
- 769 10. Rishishwar L, Wang L, Clayton EA, Marino-Ramirez L, McDonald JF, Jordan IK. Population  
770 and clinical genetics of human transposable elements in the (post) genomic era. *Mobile genetic*  
771 *elements.* 2017;7(1):1-20. Epub 2017/02/24. doi: 10.1080/2159256x.2017.1280116. PubMed  
772 PMID: 28228978; PubMed Central PMCID: PMCPMC5305044.
- 773 11. Chuong EB, Elde NC, Feschotte C. Regulatory activities of transposable elements: from  
774 conflicts to benefits. *Nat Rev Genet.* 2017;18(2):71-86. Epub 2016/11/22. doi:  
775 10.1038/nrg.2016.139. PubMed PMID: 27867194; PubMed Central PMCID: PMCPMC5498291.
- 776 12. Casacuberta E, Gonzalez J. The impact of transposable elements in environmental  
777 adaptation. *Mol Ecol.* 2013;22(6):1503-17. Epub 2013/01/09. doi: 10.1111/mec.12170. PubMed  
778 PMID: 23293987.

- 779 13. Hua-Van A, Le Rouzic A, Boutin TS, Filee J, Capy P. The struggle for life of the genome's  
780 selfish architects. *Biol Direct*. 2011;6:19. Epub 2011/03/19. doi: 10.1186/1745-6150-6-19. PubMed  
781 PMID: 21414203; PubMed Central PMCID: PMCPMC3072357.
- 782 14. Guio L, Gonzalez J. New insights on the evolution of genome content: population dynamics  
783 of transposable elements in flies and humans. *Methods in Molecular Biology* press.
- 784 15. Elbarbary RA, Lucas BA, Maquat LE. Retrotransposons as regulators of gene expression.  
785 *Science*. 2016;351(6274):aac7247. Epub 2016/02/26. doi: 10.1126/science.aac7247. PubMed  
786 PMID: 26912865; PubMed Central PMCID: PMCPMC4788378.
- 787 16. Petrov DA, Fiston-Lavier AS, Lipatov M, Lenkov K, Gonzalez J. Population genomics of  
788 transposable elements in *Drosophila melanogaster*. *Mol Biol Evol*. 2011;28(5):1633-44. doi:  
789 10.1093/molbev/msq337. PubMed PMID: 21172826; PubMed Central PMCID: PMCPMC3080135.
- 790 17. Chuong EB, Elde NC, Feschotte C. Regulatory evolution of innate immunity through co-  
791 option of endogenous retroviruses. *Science*. 2016;351(6277):1083-7. Epub 2016/03/05. doi:  
792 10.1126/science.aad5497. PubMed PMID: 26941318; PubMed Central PMCID: PMCPMC4887275.
- 793 18. Daborn PJ, Yen JL, Bogwitz MR, Le Goff G, Feil E, Jeffers S, et al. A single p450 allele  
794 associated with insecticide resistance in *Drosophila*. *Science*. 2002;297(5590):2253-6. doi:  
795 10.1126/science.1074170. PubMed PMID: 12351787.
- 796 19. Chung H, Bogwitz MR, McCart C, Andrianopoulos A, Ffrench-Constant RH, Batterham P, et  
797 al. Cis-regulatory elements in the Accord retrotransposon result in tissue-specific expression of the  
798 *Drosophila melanogaster* insecticide resistance gene *Cyp6g1*. *Genetics*. 2007;175(3):1071-7. Epub  
799 2006/12/21. doi: 10.1534/genetics.106.066597. PubMed PMID: 17179088; PubMed Central  
800 PMCID: PMCPMC1840086.
- 801 20. Kuhn A, Ong YM, Cheng CY, Wong TY, Quake SR, Burkholder WF. Linkage disequilibrium  
802 and signatures of positive selection around LINE-1 retrotransposons in the human genome. *Proc*  
803 *Natl Acad Sci U S A*. 2014;111(22):8131-6. Epub 2014/05/23. doi: 10.1073/pnas.1401532111.  
804 PubMed PMID: 24847061; PubMed Central PMCID: PMCPMC4050588.
- 805 21. Blumenstiel JP, Chen X, He M, Bergman CM. An age-of-allele test of neutrality for  
806 transposable element insertions. *Genetics*. 2014;196(2):523-38. Epub 2013/12/18. doi:  
807 10.1534/genetics.113.158147. PubMed PMID: 24336751; PubMed Central PMCID:  
808 PMCPMC3914624.
- 809 22. Quadrana L, Bortolini Silveira A, Mayhew GF, LeBlanc C, Martienssen RA, Jeddelloh JA, et  
810 al. The *Arabidopsis thaliana* mobilome and its impact at the species level. *Elife*. 2016;5. Epub  
811 2016/06/04. doi: 10.7554/eLife.15716. PubMed PMID: 27258693; PubMed Central PMCID:  
812 PMCPMC4917339.
- 813 23. Stuart T, Eichten SR, Cahn J, Karpievitch YV, Borevitz JO, Lister R. Population scale mapping  
814 of transposable element diversity reveals links to gene regulation and epigenomic variation. *Elife*.  
815 2016;5. Epub 2016/12/03. doi: 10.7554/eLife.20777. PubMed PMID: 27911260; PubMed Central  
816 PMCID: PMCPMC5167521.
- 817 24. Gonzalez J, Petrov DA. Evolution of genome content: population dynamics of transposable  
818 elements in flies and humans. *Methods in molecular biology (Clifton, NJ)*. 2012;855:361-83. Epub  
819 2012/03/13. doi: 10.1007/978-1-61779-582-4\_13. PubMed PMID: 22407716.
- 820 25. David JR, Capy P. Genetic variation of *Drosophila melanogaster* natural populations.  
821 *Trends Genet*. 1988;4(4):106-11. Epub 1988/04/01. PubMed PMID: 3149056.

- 822 26. Li H, Stephan W. Inferring the demographic history and rate of adaptive substitution in  
823 *Drosophila*. *PLoS Genet*. 2006;2(10):e166. doi: 10.1371/journal.pgen.0020166. PubMed PMID:  
824 17040129; PubMed Central PMCID: PMCPMC1599771.
- 825 27. Hervas S, Sanz E, Casillas S, Pool JE, Barbadilla A. PopFly: the *Drosophila* population  
826 genomics browser. *Bioinformatics*. 2017;33(17):2779-80. doi: 10.1093/bioinformatics/btx301.
- 827 28. Gramates LS, Marygold SJ, Santos Gd, Urbano J-M, Antonazzo G, Matthews BB, et al.  
828 FlyBase at 25: looking to the future. *Nucleic Acids Research*. 2017;45(D1):D663-D71. doi:  
829 10.1093/nar/gkw1016.
- 830 29. Kaminker JS, Bergman CM, Kronmiller B, Carlson J, Svirskas R, Patel S, et al. The  
831 transposable elements of the *Drosophila melanogaster* euchromatin: a genomics perspective.  
832 *Genome Biol*. 2002;3(12):Research0084. Epub 2003/01/23. PubMed PMID: 12537573; PubMed  
833 Central PMCID: PMCPMC151186.
- 834 30. Quesneville H, Bergman CM, Andrieu O, Autard D, Nouaud D, Ashburner M, et al.  
835 Combined Evidence Annotation of Transposable Elements in Genome Sequences. *PLOS*  
836 *Computational Biology*. 2005;1(2):e22. doi: 10.1371/journal.pcbi.0010022.
- 837 31. Fiston-Lavier AS, Barron MG, Petrov DA, Gonzalez J. T-lex2: genotyping, frequency  
838 estimation and re-annotation of transposable elements using single or pooled next-generation  
839 sequencing data. *Nucleic Acids Res*. 2015;43(4):e22. doi: 10.1093/nar/gku1250. PubMed PMID:  
840 25510498; PubMed Central PMCID: PMCPMC4344482.
- 841 32. Chen D, Chen HW. Using the Köppen classification to quantify climate variation and  
842 change: An example for 1901–2010. *Environmental Development*. 2013;6:69-79. doi:  
843 <http://dx.doi.org/10.1016/j.envdev.2013.03.007>.
- 844 33. Hill WG, Robertson A. The effect of linkage on limits to artificial selection. *Genetical*  
845 *research*. 1966;8(3):269-94. Epub 1966/12/01. PubMed PMID: 5980116.
- 846 34. Smith JM, Haigh J. The hitch-hiking effect of a favourable gene. *Genetical research*.  
847 1974;23(1):23-35. Epub 1974/02/01. PubMed PMID: 4407212.
- 848 35. Charlesworth B, Morgan MT, Charlesworth D. The effect of deleterious mutations on  
849 neutral molecular variation. *Genetics*. 1993;134(4):1289-303. Epub 1993/08/01. PubMed PMID:  
850 8375663; PubMed Central PMCID: PMCPMC1205596.
- 851 36. Hudson RR, Kaplan NL. Deleterious background selection with recombination. *Genetics*.  
852 1995;141(4):1605-17. Epub 1995/12/01. PubMed PMID: 8601498; PubMed Central PMCID:  
853 PMCPMC1206891.
- 854 37. Barron MG, Fiston-Lavier AS, Petrov DA, Gonzalez J. Population genomics of transposable  
855 elements in *Drosophila*. *Annu Rev Genet*. 2014;48:561-81. doi: 10.1146/annurev-genet-120213-  
856 092359. PubMed PMID: 25292358.
- 857 38. Castellano D, Coronado-Zamora M, Campos JL, Barbadilla A, Eyre-Walker A. Adaptive  
858 Evolution Is Substantially Impeded by Hill–Robertson Interference in *Drosophila*. *Molecular Biology*  
859 *and Evolution*. 2016;33(2):442-55. doi: 10.1093/molbev/msv236. PubMed PMID: PMC4794616.
- 860 39. Sellis D, Callahan BJ, Petrov DA, Messer PW. Heterozygote advantage as a natural  
861 consequence of adaptation in diploids. *Proceedings of the National Academy of Sciences of the*  
862 *United States of America*. 2011;108(51):20666-71. doi: 10.1073/pnas.1114573108. PubMed PMID:  
863 PMC3251125.



- 864 40. Bergman CM, Bensasson D. Recent LTR retrotransposon insertion contrasts with waves of  
865 non-LTR insertion since speciation in *Drosophila melanogaster*. Proceedings of the  
866 National Academy of Sciences. 2007;104(27):11340-5. doi: 10.1073/pnas.0702552104.
- 867 41. Montgomery E, Charlesworth B, Langley CH. A test for the role of natural selection in the  
868 stabilization of transposable element copy number in a population of *Drosophila melanogaster*.  
869 Genetical research. 1987;49(1):31-41. Epub 1987/02/01. PubMed PMID: 3032743.
- 870 42. Petrov DA, Aminetzach YT, Davis JC, Bensasson D, Hirsh AE. Size matters: non-LTR  
871 retrotransposable elements and ectopic recombination in *Drosophila*. Mol Biol Evol.  
872 2003;20(6):880-92. Epub 2003/04/30. doi: 10.1093/molbev/msg102. PubMed PMID: 12716993.
- 873 43. Petrov DA, Chao YC, Stephenson EC, Hartl DL. Pseudogene evolution in *Drosophila*  
874 suggests a high rate of DNA loss. Mol Biol Evol. 1998;15(11):1562-7. Epub 2003/02/08. PubMed  
875 PMID: 12572619.
- 876 44. Voight BF, Kudaravalli S, Wen X, Pritchard JK. A Map of Recent Positive Selection in the  
877 Human Genome. PLOS Biology. 2006;4(3):e72. doi: 10.1371/journal.pbio.0040072.
- 878 45. Garud NR, Messer PW, Buzbas EO, Petrov DA. Recent Selective Sweeps in North American  
879 *Drosophila melanogaster* Show Signatures of Soft Sweeps. PLOS Genetics. 2015;11(2):e1005004.  
880 doi: 10.1371/journal.pgen.1005004.
- 881 46. Ferrer-Admetlla A, Liang M, Korneliussen T, Nielsen R. On detecting incomplete soft or  
882 hard selective sweeps using haplotype structure. Mol Biol Evol. 2014;31(5):1275-91. Epub  
883 2014/02/21. doi: 10.1093/molbev/msu077. PubMed PMID: 24554778; PubMed Central PMCID:  
884 PMC3995338.
- 885 47. Kapun M, Barron Aduriz MG, Staubach F, Vieira J, Obbard D, Goubert C, et al. Genomic  
886 analysis of European *Drosophila* populations reveals longitudinal structure and continent-wide  
887 selection. bioRxiv. 2018. doi: 10.1101/313759.
- 888 48. Weir BS, Cockerham CC. Estimating F-statistics for the analysis of population structure.  
889 Evolution. 1984;38(6):1358-70. doi: 10.1111/j.1558-5646.1984.tb05657.x. PubMed PMID:  
890 28563791.
- 891 49. Huang da W, Sherman BT, Lempicki RA. Bioinformatics enrichment tools: paths toward the  
892 comprehensive functional analysis of large gene lists. Nucleic Acids Res. 2009;37(1):1-13. Epub  
893 2008/11/27. doi: 10.1093/nar/gkn923. PubMed PMID: 19033363; PubMed Central PMCID:  
894 PMC2615629.
- 895 50. Huang DW, Sherman BT, Lempicki RA. Systematic and integrative analysis of large gene  
896 lists using DAVID bioinformatics resources. Nat Protocols. 2008;4(1):44-57. doi:  
897 [http://www.nature.com/nprot/journal/v4/n1/supinfo/nprot.2008.211\\_S1.html](http://www.nature.com/nprot/journal/v4/n1/supinfo/nprot.2008.211_S1.html).
- 898 51. Shabalin AA. Matrix eQTL: ultra fast eQTL analysis via large matrix operations.  
899 Bioinformatics. 2012;28(10):1353-8. doi: 10.1093/bioinformatics/bts163. PubMed PMID:  
900 PMC3348564.
- 901 52. Huang W, Carbone MA, Magwire MM, Peiffer JA, Lyman RF, Stone EA, et al. Genetic basis  
902 of transcriptome diversity in *Drosophila melanogaster*. Proc Natl Acad Sci U S A.  
903 2015;112(44):E6010-9. Epub 2015/10/21. doi: 10.1073/pnas.1519159112. PubMed PMID:  
904 26483487; PubMed Central PMCID: PMC4640795.

- 905 53. Mackay TF. Mutations and quantitative genetic variation: lessons from *Drosophila*.  
906 Philosophical transactions of the Royal Society of London Series B, Biological sciences.  
907 2010;365(1544):1229-39. Epub 2010/03/24. doi: 10.1098/rstb.2009.0315. PubMed PMID:  
908 20308098; PubMed Central PMCID: PMCPMC2871822.
- 909 54. Cridland JM, Thornton KR, Long AD. Gene Expression Variation in *Drosophila melanogaster*  
910 Due to Rare Transposable Element Insertion Alleles of Large Effect. *Genetics*. 2015;199(1):85-93.  
911 doi: 10.1534/genetics.114.170837. PubMed PMID: PMC4286695.
- 912 55. Aminetzach YT, Macpherson JM, Petrov DA. Pesticide resistance via transposition-  
913 mediated adaptive gene truncation in *Drosophila*. *Science*. 2005;309(5735):764-7. Epub  
914 2005/07/30. doi: 10.1126/science.1112699. PubMed PMID: 16051794.
- 915 56. Guio L, Barron MG, Gonzalez J. The transposable element Bari-Jheh mediates oxidative  
916 stress response in *Drosophila*. *Mol Ecol*. 2014;23(8):2020-30. doi: 10.1111/mec.12711. PubMed  
917 PMID: 24629106.
- 918 57. Mateo L, Ullastres A, Gonzalez J. A transposable element insertion confers xenobiotic  
919 resistance in *Drosophila*. *PLoS Genet*. 2014;10(8):e1004560. doi: 10.1371/journal.pgen.1004560.  
920 PubMed PMID: 25122208; PubMed Central PMCID: PMCPMC4133159.
- 921 58. Ullastres A, Petit N, Gonzalez J. Exploring the phenotypic space and the evolutionary  
922 history of a natural mutation in *Drosophila melanogaster*. *Mol Biol Evol*. 2015;32(7):1800-14. doi:  
923 10.1093/molbev/msv061. PubMed PMID: 25862139; PubMed Central PMCID: PMCPMC4476160.
- 924 59. Merenciano M, Ullastres A, de Cara MA, Barron MG, Gonzalez J. Multiple independent  
925 retroelement insertions in the promoter of a stress response gene have variable molecular and  
926 functional effects in *Drosophila*. *PLoS Genet*. 2016;12(8):e1006249. doi:  
927 10.1371/journal.pgen.1006249. PubMed PMID: 27517860; PubMed Central PMCID:  
928 PMCPMC4982627.
- 929 60. Schmidt JM, Good RT, Appleton B, Sherrard J, Raymant GC, Bogwitz MR, et al. Copy  
930 number variation and transposable elements feature in recent, ongoing adaptation at the *Cyp6g1*  
931 locus. *PLoS Genet*. 2010;6(6):e1000998. Epub 2010/06/30. doi: 10.1371/journal.pgen.1000998.  
932 PubMed PMID: 20585622; PubMed Central PMCID: PMCPMC2891717.
- 933 61. Kofler R, Betancourt AJ, Schlotterer C. Sequencing of pooled DNA samples (Pool-Seq)  
934 uncovers complex dynamics of transposable element insertions in *Drosophila melanogaster*. *PLoS*  
935 *Genet*. 2012;8(1):e1002487. Epub 2012/02/01. doi: 10.1371/journal.pgen.1002487. PubMed  
936 PMID: 22291611; PubMed Central PMCID: PMCPMC3266889.
- 937 62. Zhu CT, Chang C, Reenan RA, Helfand SL. Indy gene variation in natural populations confers  
938 fitness advantage and life span extension through transposon insertion. *Aging*. 2014;6(1):58-69.  
939 Epub 2014/02/13. doi: 10.18632/aging.100634. PubMed PMID: 24519859; PubMed Central  
940 PMCID: PMCPMC3927810.
- 941 63. Mateo L, Rech G, Gonzalez J. Genome-wide patterns of local adaptation in *Drosophila*  
942 *melanogaster*: adding intra European variability to the map. *bioRxiv*. 2018. doi: 10.1101/269332.
- 943 64. Villanueva-Cañas JL, Rech GE, de Cara MAR, González J. Beyond SNPs: how to detect  
944 selection on transposable element insertions. *Methods in Ecology and Evolution*. 2017;8(6):728-  
945 37. doi: 10.1111/2041-210X.12781.
- 946 65. Pritchard JK, Di Rienzo A. Adaptation – not by sweeps alone. *Nature Reviews Genetics*.  
947 2010;11:665. doi: 10.1038/nrg2880.

- 948 66. Coop G, Witonsky D, Di Rienzo A, Pritchard JK. Using Environmental Correlations to  
949 Identify Loci Underlying Local Adaptation. *Genetics*. 2010;185(4):1411-23. doi:  
950 10.1534/genetics.110.114819. PubMed PMID: PMC2927766.
- 951 67. Frichot E, François O, O'Meara B. LEA: An R package for landscape and ecological  
952 association studies. *Methods in Ecology and Evolution*. 2015;6(8):925-9. doi: doi:10.1111/2041-  
953 210X.12382.
- 954 68. Gautier M. Genome-Wide Scan for Adaptive Divergence and Association with Population-  
955 Specific Covariates. *Genetics*. 2015;201(4):1555-79. Epub 2015/10/21. doi:  
956 10.1534/genetics.115.181453. PubMed PMID: 26482796; PubMed Central PMCID:  
957 PMC4676524.
- 958 69. Ahrens CW, Rymer PD, Stow A, Bragg J, Dillon S, Umbers KDL, et al. The search for loci  
959 under selection: trends, biases and progress. *Mol Ecol*. 2018;27(6):1342-56. Epub 2018/03/11. doi:  
960 10.1111/mec.14549. PubMed PMID: 29524276.
- 961 70. Zonato V, Collins L, Pegoraro M, Tauber E, Kyriacou CP. Is diapause an ancient adaptation  
962 in *Drosophila*? *J Insect Physiol*. 2017;98:267-74. doi: 10.1016/j.jinsphys.2017.01.017. PubMed  
963 PMID: 28161445.
- 964 71. Kolaczowski B, Kern AD, Holloway AK, Begun DJ. Genomic Differentiation Between  
965 Temperate and Tropical Australian Populations of *Drosophila melanogaster*. *Genetics*.  
966 2011;187(1):245-60. doi: 10.1534/genetics.110.123059.
- 967 72. Fabian DK, Kapun M, Nolte V, Kofler R, Schmidt PS, Schlotterer C, et al. Genome-wide  
968 patterns of latitudinal differentiation among populations of *Drosophila melanogaster* from North  
969 America. *Mol Ecol*. 2012;21(19):4748-69. doi: 10.1111/j.1365-294X.2012.05731.x. PubMed PMID:  
970 22913798; PubMed Central PMCID: PMC3482935.
- 971 73. Reinhardt JA, Kolaczowski B, Jones CD, Begun DJ, Kern AD. Parallel geographic variation in  
972 *Drosophila melanogaster*. *Genetics*. 2014;197(1):361-73. doi: 10.1534/genetics.114.161463.  
973 PubMed PMID: 24610860; PubMed Central PMCID: PMC4012493.
- 974 74. Bergland AO, Behrman EL, O'Brien KR, Schmidt PS, Petrov DA. Genomic evidence of rapid  
975 and stable adaptive oscillations over seasonal time scales in *Drosophila*. *PLoS Genet*.  
976 2014;10(11):e1004775. doi: 10.1371/journal.pgen.1004775. PubMed PMID: 25375361; PubMed  
977 Central PMCID: PMC4222749.
- 978 75. Kapun M, Fabian DK, Goudet J, Flatt T. Genomic evidence for adaptive inversion clines in  
979 *Drosophila melanogaster*. *Mol Biol Evol*. 2016;33(5):1317-36. Epub 2016/01/23. doi:  
980 10.1093/molbev/msw016. PubMed PMID: 26796550.
- 981 76. Pool JE, Braun DT, Lack JB. Parallel Evolution of Cold Tolerance within *Drosophila*  
982 *melanogaster*. *Mol Biol Evol*. 2017;34(2):349-60. Epub 2016/10/26. doi: 10.1093/molbev/msw232.  
983 PubMed PMID: 27777283; PubMed Central PMCID: PMC45526443.
- 984 77. Rahman R, Chirn GW, Kanodia A, Sytnikova YA, Brembs B, Bergman CM, et al. Unique  
985 transposon landscapes are pervasive across *Drosophila melanogaster* genomes. *Nucleic Acids Res*.  
986 2015;43(22):10655-72. Epub 2015/11/19. doi: 10.1093/nar/gkv1193. PubMed PMID: 26578579;  
987 PubMed Central PMCID: PMC4678822.
- 988 78. Nelson MG, Linheiro RS, Bergman CM. McClintock: An Integrated Pipeline for Detecting  
989 Transposable Element Insertions in Whole-Genome Shotgun Sequencing Data. *G3 (Bethesda)*.

- 990 2017;7(8):2763-78. Epub 2017/06/24. doi: 10.1534/g3.117.043893. PubMed PMID: 28637810;  
991 PubMed Central PMCID: PMCPMC5555480.
- 992 79. Chakraborty M, VanKuren NW, Zhao R, Zhang X, Kalsow S, Emerson JJ. Hidden genetic  
993 variation shapes the structure of functional elements in *Drosophila*. *Nature Genetics*.  
994 2018;50(1):20-5. doi: 10.1038/s41588-017-0010-y.
- 995 80. Ullastres A, Gonzalez J. in prep.
- 996 81. Lack JB, Cardeno CM, Crepeau MW, Taylor W, Corbett-Detig RB, Stevens KA, et al. The  
997 *Drosophila* genome nexus: a population genomic resource of 623 *Drosophila melanogaster*  
998 genomes, including 197 from a single ancestral range population. *Genetics*. 2015;199(4):1229-41.  
999 Epub 2015/01/30. doi: 10.1534/genetics.115.174664. PubMed PMID: 25631317; PubMed Central  
1000 PMCID: PMCPMC4391556.
- 1001 82. Campo D, Lehmann K, Fjeldsted C, Souaiaia T, Kao J, Nuzhdin SV. Whole-genome  
1002 sequencing of two North American *Drosophila melanogaster* populations reveals genetic  
1003 differentiation and positive selection. *Mol Ecol*. 2013;22(20):5084-97. Epub 2013/10/10. doi:  
1004 10.1111/mec.12468. PubMed PMID: 24102956; PubMed Central PMCID: PMCPMC3800041.
- 1005 83. Bastide H, Betancourt A, Nolte V, Tobler R, Stöbe P, Futschik A, et al. A Genome-Wide,  
1006 Fine-Scale Map of Natural Pigmentation Variation in *Drosophila melanogaster*. *PLOS Genetics*.  
1007 2013;9(6):e1003534. doi: 10.1371/journal.pgen.1003534.
- 1008 84. Attrill H, Falls K, Goodman JL, Millburn GH, Antonazzo G, Rey AJ, et al. FlyBase: establishing  
1009 a gene group resource for *Drosophila melanogaster*. *Nucleic Acids Res*. 2016;44(D1):D786-92. doi:  
1010 10.1093/nar/gkv1046. PubMed PMID: 26467478; PubMed Central PMCID: PMCPMC4702782.
- 1011 85. Mohr SE, Hu Y, Kim K, Housden BE, Perrimon N. Resources for functional genomics studies  
1012 in *Drosophila melanogaster*. *Genetics*. 2014;197(1):1-18. doi: 10.1534/genetics.113.154344.  
1013 PubMed PMID: 24653003; PubMed Central PMCID: PMCPMC4012471.
- 1014 86. Kapitonov VV, Jurka J. Molecular paleontology of transposable elements in the *Drosophila*  
1015 *melanogaster* genome. *Proc Natl Acad Sci U S A*. 2003;100(11):6569-74. Epub 2003/05/14. doi:  
1016 10.1073/pnas.0732024100. PubMed PMID: 12743378; PubMed Central PMCID: PMCPMC164487.
- 1017 87. Comeron JM, Ratnappan R, Bailin S. The Many Landscapes of Recombination in *Drosophila*  
1018 *melanogaster*. *PLOS Genetics*. 2012;8(10):e1002905. doi: 10.1371/journal.pgen.1002905.
- 1019 88. Fiston-Lavier AS, Singh ND, Lipatov M, Petrov DA. *Drosophila melanogaster* recombination  
1020 rate calculator. *Gene*. 2010;463(1-2):18-20. doi: 10.1016/j.gene.2010.04.015. PubMed PMID:  
1021 20452408.
- 1022 89. Pool JE, Corbett-Detig RB, Sugino RP, Stevens KA, Cardeno CM, Crepeau MW, et al.  
1023 Population genomics of sub-saharan *Drosophila melanogaster*: African diversity and non-African  
1024 admixture. *PLoS Genet*. 2012;8(12):e1003080. doi: 10.1371/journal.pgen.1003080. PubMed PMID:  
1025 23284287; PubMed Central PMCID: PMCPMC3527209.
- 1026 90. Huang W, Massouras A, Inoue Y, Peiffer J, Ramia M, Tarone AM, et al. Natural variation in  
1027 genome architecture among 205 *Drosophila melanogaster* Genetic Reference Panel lines. *Genome*  
1028 *Res*. 2014;24(7):1193-208. doi: 10.1101/gr.171546.113. PubMed PMID: 24714809; PubMed  
1029 Central PMCID: PMCPMC4079974.

- 1030 91. Mackay TF, Richards S, Stone EA, Barbadilla A, Ayroles JF, Zhu D, et al. The *Drosophila*  
1031 *melanogaster* Genetic Reference Panel. *Nature*. 2012;482(7384):173-8. doi: 10.1038/nature10811.  
1032 PubMed PMID: 22318601; PubMed Central PMCID: PMC3683990.
- 1033 92. Flutre T, Duprat E, Feuillet C, Quesneville H. Considering Transposable Element  
1034 Diversification in De Novo Annotation Approaches. *PLOS ONE*. 2011;6(1):e16526. doi:  
1035 10.1371/journal.pone.0016526.
- 1036 93. Hoede C, Arnoux S, Moisset M, Chaumier T, Inizan O, Jamilloux V, et al. PASTEC: an  
1037 automatic transposable element classification tool. *PLoS One*. 2014;9(5):e91929. Epub  
1038 2014/05/03. doi: 10.1371/journal.pone.0091929. PubMed PMID: 24786468; PubMed Central  
1039 PMCID: PMC4008368.
- 1040 94. Thompson JD, Gibson TJ, Plewniak F, Jeanmougin F, Higgins DG. The CLUSTAL\_X windows  
1041 interface: flexible strategies for multiple sequence alignment aided by quality analysis tools.  
1042 *Nucleic Acids Res*. 1997;25(24):4876-82. Epub 1998/02/28. PubMed PMID: 9396791; PubMed  
1043 Central PMCID: PMC147148.
- 1044 95. Katoh K, Misawa K, Kuma Ki, Miyata T. MAFFT: a novel method for rapid multiple  
1045 sequence alignment based on fast Fourier transform. *Nucleic Acids Research*. 2002;30(14):3059-  
1046 66. doi: 10.1093/nar/gkf436.
- 1047 96. Guindon S, Gascuel O. A simple, fast, and accurate algorithm to estimate large phylogenies  
1048 by maximum likelihood. *Systematic biology*. 2003;52(5):696-704. Epub 2003/10/08. PubMed  
1049 PMID: 14530136.
- 1050 97. Junier T, Zdobnov EM. The Newick utilities: high-throughput phylogenetic tree processing  
1051 in the UNIX shell. *Bioinformatics*. 2010;26(13):1669-70. Epub 2010/05/18. doi:  
1052 10.1093/bioinformatics/btq243. PubMed PMID: 20472542; PubMed Central PMCID:  
1053 PMC2887050.
- 1054 98. Lack JB, Lange JD, Tang AD, Corbett-Detig RB, Pool JE. A thousand fly genomes: an  
1055 expanded *Drosophila* genome nexus. *Mol Biol Evol*. 2016;33(12):3308-13. doi:  
1056 10.1093/molbev/msw195. PubMed PMID: 27687565; PubMed Central PMCID: PMC5100052.
- 1057 99. Grenier JK, Arguello JR, Moreira MC, Gottipati S, Mohammed J, Hackett SR, et al. Global  
1058 diversity lines - a five-continent reference panel of sequenced *Drosophila melanogaster* strains. *G3*  
1059 (Bethesda). 2015;5(4):593-603. Epub 2015/02/13. doi: 10.1534/g3.114.015883. PubMed PMID:  
1060 25673134; PubMed Central PMCID: PMC4390575.
- 1061 100. Delaneau O, Marchini J, Zagury JF. A linear complexity phasing method for thousands of  
1062 genomes. *Nature methods*. 2011;9(2):179-81. Epub 2011/12/06. doi: 10.1038/nmeth.1785.  
1063 PubMed PMID: 22138821.
- 1064 101. Danecek P, Auton A, Abecasis G, Albers CA, Banks E, DePristo MA, et al. The variant call  
1065 format and VCFtools. *Bioinformatics*. 2011;27(15):2156-8. doi: 10.1093/bioinformatics/btr330.  
1066 PubMed PMID: 21653522; PubMed Central PMCID: PMC3137218.
- 1067 102. Parsch J, Novozhilov S, Saminadin-Peter SS, Wong KM, Andolfatto P. On the utility of short  
1068 intron sequences as a reference for the detection of positive and negative selection in *Drosophila*.  
1069 *Mol Biol Evol*. 2010;27(6):1226-34. doi: 10.1093/molbev/msq046. PubMed PMID: 20150340;  
1070 PubMed Central PMCID: PMC2877998.

- 1071 103. Szpiech ZA, Hernandez RD. selscan: An Efficient Multithreaded Program to Perform EHH-  
1072 Based Scans for Positive Selection. *Molecular Biology and Evolution*. 2014;31(10):2824-7. doi:  
1073 10.1093/molbev/msu211.
- 1074 104. Bergland AO, Tobler R, Gonzalez J, Schmidt P, Petrov D. Secondary contact and local  
1075 adaptation contribute to genome-wide patterns of clinal variation in *Drosophila melanogaster*.  
1076 *Mol Ecol*. 2016;25(5):1157-74. doi: 10.1111/mec.13455. PubMed PMID: 26547394; PubMed  
1077 Central PMCID: PMC5089930.
- 1078 105. Chen D, Liang Z. The Analysis of Sequence Features of Introns with *Drosophila* RP genes.  
1079 *International Journal of Information Processing and Management (IJIPM)*. 2013;4(1):6. doi:  
1080 doi:10.4156/ijipm.vol4.issue1.6.
- 1081 106. Park SG, Hannenhalli S, Choi SS. Conservation in first introns is positively associated with  
1082 the number of exons within genes and the presence of regulatory epigenetic signals. *BMC*  
1083 *Genomics*. 2014;15(1):526. doi: 10.1186/1471-2164-15-526. PubMed PMID: PMC4085337.
- 1084 107. Hoskins RA, Carlson JW, Wan KH, Park S, Mendez I, Galle SE, et al. The Release 6 reference  
1085 sequence of the *Drosophila melanogaster* genome. *Genome Res*. 2015;25(3):445-58. Epub  
1086 2015/01/16. doi: 10.1101/gr.185579.114. PubMed PMID: 25589440; PubMed Central PMCID:  
1087 PMC4352887.

1088

1089

## 1090 **Supporting information**

1091 **S1 Fig. Distribution of number of TEs that are present at >0.10 and < 0.95 frequency by**  
1092 **number of populations in which they are present at that frequency.** We considered TEs to be  
1093 present at high frequency (HighFreq) when they fulfil the frequency condition in at least three  
1094 samples (represented by blue bars in the figure).

1095 **S2 Fig. Comparison of age estimations obtained by Bergman and Bensasson (2007) and the**  
1096 **estimations obtained in this work.** Only the 417 TEs that are common between the two studies are  
1097 plotted. A) TE age distribution of the 417 TEs based on Bergman and Bensasson (2007) and in this  
1098 work. Note that there are 10 insertions that showed extreme age values in our dataset ( $> 0.12$ ). B)  
1099 Correlation between the two age estimates before and after removing the 10 TEs with extreme age  
1100 values in our data set ( $n = 407$ ).

1101 **S3 Fig. Venn diagrams for the 36 HighFreq TEs with significant evidence of selective sweeps.**  
1102 **A) Overlapping between TEs showing significant results for the different selective sweeps**  
1103 **statistics (*iHS*, *H12* and *nSL*).** B) Overlapping between TEs showing at least one significant test in  
1104 the North American (NA) and/or the European (EU) population. The percentage between brackets  
1105 is regarding the total number of significant TEs (36). Numbers between square brackets show the  
1106 number of TEs for which we were able to calculate at least one of the sweep statistics.

1107 **S4 Fig. Venn diagrams showing the overlap between TEs showing significant  $F_{ST}$  values in at**  
1108 **least one pair of populations.** A) TEs present at high frequency in populations located at low  
1109 latitude locations. B) TEs present at high frequency in populations located at high latitude locations.

1110 **S5 Fig. Functional enrichment analysis of genes nearby OOA and AF-OOA TEs. A)**  
1111 **Significant Gene Ontology Clusters according to DAVID functional annotation tool.** Only the  
1112 top six significant clusters are showed (enrichment score  $> 1.3$ ). The horizontal axis represents  
1113 DAVID enrichment score (see S9C and S9D Tables for details). B) Significantly overrepresented  
1114 fitness-related genes according to previous genome association studies. All FDR corrected p-values  
1115  $< 0.05$ , Chi-square test (see S11C and S11D Tables for details). The horizontal axis represent the  
1116  $\log_{10}(\chi^2)$ . In both cases, A) and B), numbers nearby each bar indicate total number of genes in that  
1117 category. Bar colors indicates similar biological functions of the clusters (A) and the fitness-related  
1118 traits (B): green: stress response; red: behavior; blue: development; and yellow: transport.

1119 **S6 Fig. Distribution of the number of TEs (y axis) by the number of strains for which *T-lex2***  
1120 **estimated frequencies in the 8 individually-sequenced populations.**

1121 **S7 Fig. Distribution of mapped reads for the presence module (red), absence module (green)**  
1122 **and total number of reads (blue) for each one of the 48 DrosEU samples (Kapun *et al.* 2018).**

1123 **S8 Fig. Correlation between frequencies estimated with data obtained using different**  
1124 **sequencing strategies in the Stockholm (Sweden) population.** Frequencies calculated using  
1125 individual strain sequencing (x) (Mateo et al 2018) and pool sequencing (y). Pearson correlation  
1126 coefficient  $r = 0.98$ , p-value  $< 2.2e^{-16}$ .

1127 **S9 Fig. Histogram showing the number of TEs (y axis) and the number of samples for which**  
1128 **we were able to estimate its frequency.**

1129 **S10 Fig. TE frequencies estimated using all strains (x axis) vs. frequencies estimated after**  
1130 **removing strains that contain inversions (y axis) for different individually-sequenced**  
1131 **populations. A) Zambia (Lack et al., 2015), B) France (Pool et al., 2012), C) DGRP (Raleigh)**  
1132 **(Huang et al. 2014; Mackay et al. 2012), D) Italy (Bari) and E) Sweden (Stockholm) (Mateo et al**  
1133 **2018). All Pearson correlation coefficients  $r=0.99$  and  $p\text{-value} < 2.2e^{-16}$ .**

1134 **S11 Fig. Distribution of iHS values obtained for TEs (red) and neutral SNPs (cyan) in the**  
1135 **North American population (DGRP, Raleigh, North Carolina). A) Distribution of iHS values**  
1136 **for all TEs and neutral SNPs. B) Distribution of iHS values for TEs and neutral SNPs at high**  
1137 **frequency ( $> 0.10$ ) in the OOA population (Raleigh) and in the African population (Zambia). C)**  
1138 **Distribution of iHS values for TEs and neutral SNPs at high frequency ( $> 0.10$ ) in the OOA**  
1139 **population, but at low frequency in the African population.**

1140

1141 **S1 Table. Information for the 91 samples used in this study.**

1142 **S2 Table. Frequency estimations using Tlex2 for the 1,615 TEs at each of the 91 samples. NA**  
1143 **indicates that the frequency could not be estimated for that TE in the given sample. Recombination**  
1144 **estimates according to Comeron et al. (2012) and Fiston-Lavier et al. (2010) are showed for each**  
1145 **TE. Class column indicates the category at which each TE was classified.**

1146 **S3 Table. TEs at each category classified as young (divergence  $< 0.01$ ) or old (divergence  $\geq$**   
1147 **0.01). P-values are from Chi-square test when comparing TEs at each category the expectations**  
1148 **when considering All 1.615 TEs.**

1149

1150 **S4 Table. TE Length Ratio statistics. At the top, mean and median TE Length Ratio (%) for each**  
1151 **TE category. At the bottom, results for the Wilcoxon rank sum test and Kruskal Wallis test among**  
1152 **different TE categories.**

1153

1154 **S5 Table. Number of TEs showing significant values in the selection tests for each HighFreq**  
1155 **category. For each sweep test (iHS, H12 and nSL), “Continent” column indicates population used**  
1156 **for the analysis: NA: North America or EU: Europe. For each HighFreq category, table shows the**  
1157 **number of significant TEs / number of TEs for which the test was calculated. “At least one test”**  
1158 **indicates the number of TEs at each category showing at least one test significant / TEs with at least**  
1159 **one test calculated.**

1160

1161 **S6 Table. List of 36 TEs showing at least one significant (highlighted in red) selective sweep**  
1162 **test (iHS, H12 or nSL).**

1163

1164 **S7 Table. List of the 254 HighFreq TEs with at least one pairwise Fst calculation performed.**  
1165 **Category indicates the classification of the TE according to Figure 2. For each continent, two**  
1166 **pairwise comparisons were performed. Values for each comparison are the Fst (in red the**  
1167 **significant ones). Concordant Fst indicates whether TEs with significant Fst were at high frequency**  
1168 **in the same climate zone in more than one population. Concordance information indicates, for each**  
1169 **significant pairwise calculation (separated by ‘;’) the continent (EU, NA or OC) and the climate**  
1170 **zone at which the TE is a higher frequency (Tropical/Mild Temperature, Snow).**



1171 **S8A Table:** Results of gene ontology (GO) enrichment test for the 83 genes nearby the 65 TEs  
1172 showing evidence of selection (ES).  
1173

1174 **S8B Table.** Results of gene ontology (GO) enrichment test for the 363 genes nearby the 300  
1175 HigFreq TEs.  
1176

1177 **S8C Table:** Results of gene ontology (GO) enrichment test for the 215 genes nearby the 174 OOA  
1178 TEs.  
1179

1180 **S8D Table.** Results of gene ontology (GO) enrichment test for the 143 genes nearby the 111 AF-  
1181 OOA TEs.  
1182

1183 **S9 Table. Gene association studies analyzing different fitness-related phenotypes.**  
1184

1185 **S10 Table. Enrichment of genes previously described as associated with different stress-**  
1186 **related and behaviour-reltaed traits in the different datasets analyzed.** A) Genes the 65 TEs  
1187 with evidence of selection. B) Genes nearby the 300 HighFreq TEs. C) Genes nearby the 174 OOA  
1188 TEs. D) Genes nearby the 111 AF-OOA TEs.  
1189

1190 **S11 Table. 19 TEs showing significant correlation with the expression of nearby genes.** Results  
1191 are divided in correlations obtained with male and female expression data (Huang et al. 2015). beta:  
1192 Effect size estimate, t-stat: Test statistic (t-statistic of T-test), p-value: p-value for the linear  
1193 regression. FDR: False discovery rate estimated with Benjamini–Hochberg procedure. \* TEs  
1194 showing evidence of selection (Table 1, main text).  
1195

1196 **S12 Table. Genomic location of different TE categories.** Percentages and righth-tail p-values are  
1197 showed when the Chi-square test is significant. (A) Localization of TEs regarding the nearest gene  
1198 across categories. (B) Localization of intragenic TEs across TE categories.  
1199

1200 **S13 Table. TE classes across different TE categories.** P-values and percentages are showed in  
1201 bold when significant enrichment according to Chi-square test p-value < 0.05 when comparing with  
1202 All TEs.  
1203

1204 **S14 Table. Enrichment test for TE families. For each family, table shows the number of TEs**  
1205 **at each category.** HighFreq TEs correspond to the sum of AF, AF-NA, AF-OOA and OOA. p-  
1206 value (Bonf.) indicates Bonferroni corrected p-values for Chi-square test when comparing  
1207 HighFreq, AF-OOA and OOA TEs against All TEs. In red p-values < 0.05.  
1208

1209 **S15 Table. Genomic coordinates of cosmopolitan inversion (Kapun et al. 2016) analyzed in**  
1210 **order to determine its influence on the transposable elements frequency calculation.**  
1211

1212 **S16 Table. Summary statistics for the pairwise Fst calculations.** TEs with Fst: Number of TEs  
1213 for which it was possible to calculate Fst. Signif. (Africa H/L): Total number of significant TEs.  
1214 Between brackets: H: Number of significant TEs identified using the distribution of neutral SNPs  
1215 that are at high frequency in Africa. L: Number of significant TEs identified using the distribution  
1216 of neutral SNPs that are at low frequency in Africa (see Material and Methods). Low Latitude  
1217 (HighFreq): Significant TEs that are at high recombination rate regions (HRR) and are at high  
1218 frequency only in populations located in low latitudinal regions. High Latitude (HighFreq):  
1219 Significant TEs that are at high recombination rate regions (HRR) and are at high frequency in  
1220 populations located in high latitudinal regions. Both (HighFreq): Significant TEs that are at high

1221 recombination rate regions (HRR) and are at high frequency in populations from both, low and high  
1222 latitudinal regions.
